# Supplementary material for: Occurrence and Genetic Characterization of Grapevine Pinot Gris Virus in Russia
Source: Plants (Basel). 2022 Apr 13;11(8):1061. doi: 10.3390/plants11081061 (PMC9028157; doi:10.3390/plants11081061)
Supplement: Supplementary file 1 [file plants-11-01061-s001.zip › Supplementary Tables.xlsx]

## Sheet: Table S1
Supplementary materials, Shvets and Vinogradova, 2022. Occurrence and Genetic Characterization of Grapevine Pinot Gris Virus in Russia
Supplementary Table S1. Quantification cycle (Cq) values of qPCR for the GPGV coat protein gene in simplex and duplex with different internal control genes
Dilution	Quantification cycle (Cq) values
	Simplex analysis	Duplex analysis
	CP	CP + Cpn21	CP + GAPDH
Undiluted	18.48 ± 0.70	18.05 ± 0.38	16.21 ± 0.20
3	19.92 ± 0.25	19.71 ± 0.04	17.66 ± 0.25
9	21.23 ± 0.53	21.70 ± 0.29	19.45 ± 0.19
27	22.83 ± 0.22	22.88 ± 0.29	21.69 ± 0.57
81	25.08 ± 0.27	24.59 ± 0.26	22.53 ± 0.29

## Sheet: Table S2
Supplementary materials, Shvets and Vinogradova, 2022. Occurrence and Genetic Characterization of Grapevine Pinot Gris Virus in Russia
Supplementary Table 2. Basic information of the sampled vineyards and qPCR parameters
Region	Sample number	Variety/clone	Species/interspecific hybrid	Symptoms	Relative ratio	Cq (CP)	Viruses previosly detected in samples [54]
Republic of Crimea	RC48	Riesling	Vitis vinifera Linne subsp. vinifera	-	1.01 × 10-2	29.18	n/a*
	RC50	Rkatsiteli	Vitis vinifera Linne subsp. vinifera	-	2.55 × 10-2	28.74	n/a
	RC104	Rkatsiteli	Vitis vinifera Linne subsp. vinifera	-	3.81 × 10-1	26.91	GFLV
	RC106	Cabernet Sauvignon	Vitis vinifera Linne subsp. vinifera	-	5.61 × 10-2	26.58	n/a
	RC110	Rkatsiteli	Vitis vinifera Linne subsp. vinifera	-	5.30 × 10-2	27.62	n/a
	RC113	Cabernet Sauvignon	Vitis vinifera Linne subsp. vinifera	-	6.12	20.00	GFLV
	RC119	Rkatsiteli	Vitis vinifera Linne subsp. vinifera	-	5.24 × 10-1	23.25	GFLV
	RC129	Merlot	Vitis vinifera Linne subsp. vinifera	-	1.31 × 10-2	27.66	n/a
	RC149	Cabernet Sauvignon	Vitis vinifera Linne subsp. vinifera	-	5.21	17.78	GRSPaV, GLRaV-3
	RC167	Cabernet Sauvignon	Vitis vinifera Linne subsp. vinifera	-	5.32	22.21	GLRaV-3
	RC183	Muscat Golodrigi	Vitis vinifera	+	5.63 × 10-1	21.40	n/a
	RC185	Muscat Amber	Vitis interspecific crossing	-	2.99 × 10-1	24.70	GLRaV-2
	RC218	Cabernet Sauvignon	Vitis vinifera Linne subsp. vinifera	-	2.95 × 10-2	26.28	GVA
	RC234	Gars Levelyu	Vitis vinifera Linne subsp. vinifera	-	7.17 × 10-1	32.50	GVA, GLRaV-1, GLRaV-2
	RC240	Bastardo Magarachsky	Vitis vinifera Linne subsp. vinifera	-	5.60 × 10-1	22.47	GVA
	RC246	Asma	Vitis vinifera Linne subsp. vinifera	+	1.85 × 10-1	25.35	GVA, GLRaV-1
	RC249	Moldova	Guzal Kara x Villard Blanc	-	1.66 × 10-1	26.45	n/a
	RC251	Saperavi	Vitis vinifera Linne subsp. vinifera	-	2.05 × 10-1	24.43	GVA
	RC253	Dzhevat Kara	Vitis vinifera Linne subsp. vinifera	-	1.28 × 10-1	27.46	GVA
	RC254	Kefesia	Vitis vinifera Linne subsp. vinifera	-	1.68 × 10-1	26.53	GFLV
	RC257	Rkatsiteli	Vitis vinifera Linne subsp. vinifera	-	2.58 × 10-2	30.57	n/a
	RC258	Aleatico	Vitis vinifera Linne subsp. vinifera	-	2.80 × 10-2	27.72	GFLV
	RC265	Cabernet Sauvignon	Vitis vinifera Linne subsp. vinifera	-	3.38 × 10-2	2022-01-29	n/a
	RC274	Aligote	Vitis vinifera Linne subsp. vinifera	-	1.61 × 10-2	29.31	n/a
	RC281	Cabernet Sauvignon	Vitis vinifera Linne subsp. vinifera	-	2.06 × 10-1	26.83	n/a
	RC282	Kokur White	Vitis vinifera	-	4.86 × 10-2	28.33	n/a
	RC287	Aligote	Vitis vinifera Linne subsp. vinifera	-	8.77 × 10-1	24.35	n/a
	RC288	Kokur White	Vitis vinifera	-	1.70 × 10-1	26.75	GVA
	RC290	Odessa Black	Vitis vinifera Linne subsp. vinifera	-	1.44 × 10-1	25.55	n/a
	RC301	Odessa Black	Vitis vinifera Linne subsp. vinifera	-	3.63 × 10-2	28.61	GFLV
	RC309	Native vine variety	Unknown	-	1.01 × 10-1	24.79	n/a
	RC311	Native vine variety	Unknown	-	3.03 × 10-1	24.34	GVA, GFLV
	RC326	Italia	Vitis vinifera Linne subsp. vinifera	-	6.22 × 10-1	2022-02-25	GRSPaV, GFLV, GLRaV-3
	RC336	Bastardo	Vitis vinifera Linne subsp. vinifera	-	7.82 × 10-1	25.25	GRSPaV, GFLV
	RC338	Cabernet Sauvignon	Vitis vinifera Linne subsp. vinifera	-	4.79 × 10-1	23.92	GRSPaV, GFLV
	RC339	Aleatico	Vitis vinifera Linne subsp. vinifera	-	2.91 × 10-1	24.41	n/a
	RC346	Cabernet Sauvignon	Vitis vinifera Linne subsp. vinifera	-	9.16 × 10-2	2022-06-25	GRSPaV, GLRav-2
	RC352	Muscat White	Vitis vinifera Linne subsp. vinifera	-	4.55 × 10-1	22.70	n/a
	RC408	Cabernet Sauvignon	Vitis vinifera Linne subsp. vinifera	-	2.14 × 10-1	23.65	GRSPaV, GFkV
	RC445	Cabernet Sauvignon	Vitis vinifera Linne subsp. vinifera	-	5.69 × 10-1	28.18	GFkV
	RC446	Saperavi	Vitis vinifera Linne subsp. vinifera	-	7.37 × 10-2	25.28	GFkV
	RC473	Gars Levelyu	Vitis vinifera Linne subsp. vinifera	-	3.34 × 10-2	28.70	n/a
	RC511	Rkatsiteli	Vitis vinifera Linne subsp. vinifera	-	5.47 × 10-2	26.98	GRSPaV, GLRaV-2
	RC545	Muscat Golodrigi	Vitis vinifera	-	9.70 × 10-2	26.35	n/a
	RC561	Aligote	Vitis vinifera Linne subsp. vinifera	-	3.35 × 10-2	32.81	GLRaV-3
	RC595	Moldova	Guzal Kara x Villard Blanc	-	7.95 × 10-2	26.13	GRSPaV
	RC610	Cabernet Sauvignon	Vitis vinifera Linne subsp. vinifera	-	1.31 × 10-1	25.67	n/a
	RC632	Moldova	Guzal Kara x Villard Blanc	-	1.90 × 10-1	23.67	GFkV, GLRaV-3
	RC639	Muscat Golodrigi	Vitis vinifera	-	6.73 × 10-2	25.41	GFkV
	RC648	Italia	Vitis vinifera Linne subsp. vinifera	-	2.04 × 10-1	29.14	GLRaV-1
	RC728	Unknown	Unknown	-	1.01 × 10-2	2022-09-27	n/a
	RC750	Bastardo Magarachsky	Vitis vinifera Linne subsp. vinifera	-	2.47	21.54	GFkV
	RC775	Aligote	Vitis vinifera Linne subsp. vinifera	-	2.09 × 10-1	2022-04-28	GFkV
	RC779	Kokur White	Vitis vinifera	-	1.41	21.19	n/a
	RC806	Cabernet Franc	Vitis vinifera Linne subsp. vinifera	-	7.76 × 10-3	29.51	didn't test
	RC827	Cabernet Sauvignon	Vitis vinifera Linne subsp. vinifera	-	5.48 × 10-2	34.52	didn't test
	RC845	Chardonnay	Vitis vinifera Linne subsp. vinifera	-	1.30 × 10-1	27.75	GFkV
	RC868	Pinot Noir	Vitis vinifera Linne subsp. vinifera	-	8.36 × 10-2	26.24	GRSPaV
	RC869	Chardonnay	Vitis vinifera Linne subsp. vinifera	-	3.90 × 10-1	28.29	n/a
	RC882	Chardonnay	Vitis vinifera Linne subsp. vinifera	-	9.87 × 10-2	28.17	n/a
	RC904	Cabernet Sauvignon	Vitis vinifera Linne subsp. vinifera	-	3.96 × 10-2	26.91	GRSPaV, GVA, GFkV
	RC907	Bastardo Magarachsky	Vitis vinifera Linne subsp. vinifera	-	4.25 × 10-2	24.75	GVA, GLRaV-3
	RC908	Bastardo Magarachsky	Vitis vinifera Linne subsp. vinifera	-	2.68 × 10-1	22.67	didn't test
	RC919	Sersial	Vitis vinifera Linne subsp. vinifera	-	4.75 × 10-2	29.78	didn't test
	RC927	Aleatico	Vitis vinifera Linne subsp. vinifera	-	1.06 × 10-2	30.29	GRSPaV, GFkV
	RC931	Bastardo Magarachsky	Vitis vinifera Linne subsp. vinifera	-	1.68 × 10-2	30.32	GFkV, GFLV, GLRaV-3
	RC935	Syrah	Vitis vinifera Linne subsp. vinifera	-	1.68 × 10-1	24.46	GRSPaV
	RC1003	Bastardo Magarachsky	Vitis vinifera Linne subsp. vinifera	-	1.90 × 10-2	28.77	GRSPaV, GVA
	RC1249	Cardinal	Vitis interspecific crossing	-	3.42 × 10-2	27.71	n/a
	RC1252	Rkatsiteli	Vitis vinifera Linne subsp. vinifera	+	7.82 × 10-2	30.86	GLRaV-2
	RC1254	Rkatsiteli	Vitis vinifera Linne subsp. vinifera	-	9.28 × 10-2	32.09	n/a
	RC1272	Unknown	Unknown	-	7.97 × 10-2	2022-09-29	GRSPaV, GFkV
	RC1637	Muscat White	Vitis vinifera Linne subsp. vinifera	-	1.16 × 10-1	32.02	n/a
	RC1648	Cabernet Sauvignon	Vitis vinifera Linne subsp. vinifera	-	3.18 × 10-2	33.56	GLRaV-3
	RC1661	Cabernet Sauvignon	Vitis vinifera Linne subsp. vinifera	-	3.24 × 10-2	32.10	GLRaV-3
	RC1681	Bastardo Magarachsky	Vitis vinifera Linne subsp. vinifera	-	2.15 × 10-2	32.32	n/a
Stavropol Krai	ST1852	Unknown	Unknown	+	3.22 × 10-2	27.80	GRSPaV
	ST1859	Arcadia	Vitis interspecific crossing	-	8.51 × 10-3	29.99	GLRaV-1
Krasnodar Krai	KR1909	Moldova	Guzal Kara x Villard Blanc	-	2.30 × 10-2	26.45	n/a
	KR1912	Pinot Franc	Vitis vinifera Linne subsp. vinifera	+	8.33 × 10-2	26.65	n/a
	KR1921	Riesling	Vitis vinifera Linne subsp. vinifera	+	1.72 × 10-1	27.20	n/a
	KR21	Unknown	Unknown	+	7.29 × 10-2	27.17	GFkV
	KR40	Traminer	Vitis vinifera Linne subsp. vinifera	-	6.90 × 10-2	28.15	GLRaV-2
	KR103	Unknown	Unknown	-	3.89 × 10-2	29.49	didn't test
	KR130	Unknown	Unknown	-	2.62 × 10-2	26.96	didn't test
	KR145	Moldova	Guzal Kara x Villard Blanc	-	3.89 × 10-2	31.41	n/a
	KR203	Moldova	Guzal Kara x Villard Blanc	+	6.39 × 10-2	31.46	n/a
	KR236	Cabernet Sauvignon	Vitis vinifera Linne subsp. vinifera	-	3.06 × 10-2	23.92	GRSPaV
	KR238	Bianka	Vitis interspecific crossing	+	1.49 × 10-2	29.02	GRSPaV, GFkV
	KR267	Rkatsiteli	Vitis vinifera Linne subsp. vinifera	-	3.55 × 10-1	22.47	GRSPaV, GFkV
	KR281	Riesling Rhine	Vitis vinifera Linne subsp. vinifera	-	9.23 × 10-2	27.17	n/a
	KR285	Chardonnay	Vitis vinifera Linne subsp. vinifera	+	5.75 × 10-2	31.35	n/a
	KR293	Riesling Rhine	Vitis vinifera Linne subsp. vinifera	+	8.84 × 10-2	28.72	n/a
	KR316	Sauvignon Blanc	Vitis vinifera Linne subsp. vinifera	-	9.30 × 10-3	34.39	n/a
	KR337	Cabernet Sauvignon	Vitis vinifera Linne subsp. vinifera	-	2.21 × 10-2	34.22	n/a
	KR360	Merlot	Vitis vinifera Linne subsp. vinifera	-	1.60 × 10-2	2022-01-27	GVA, GRSPaV, GFkV, GLRaV-1
	KR383	Merlot	Vitis vinifera Linne subsp. vinifera	-	1.76 × 10-1	25.98	n/a
	KR408	Riesling	Vitis vinifera Linne subsp. vinifera	-	3.43 × 10-2	28.96	GFkV
	KR416	Kishmish Luchistyi	Vitis vinifera Linne subsp. vinifera	-	1.97 × 10-2	35.76	GFkV
	KR487	Moldova	Guzal Kara x Villard Blanc	-	3.35 × 10-2	33.72	GLRaV-2
	KR493	Rkatsiteli	Vitis vinifera Linne subsp. vinifera	-	1.09 × 10-2	35.05	GFkV
	KR504	Riesling Rhine	Vitis vinifera Linne subsp. vinifera	-	1.31 × 10-2	30.93	GFkV, GLRaV-2
	KR563	Krasnostop AZOS	Vitis vinifera	-	7.97 × 10-3	28.46	GLRaV-3
	KR573	Krasnostop AZOS	Vitis vinifera	-	3.44 × 10-2	29.47	GLRaV-3
	KR579	Pervenec Magaracha	Vitis vinifera х (Vitis vinifera x (Vitis vinifera + Vitis riparia + Vitis rupestris))	-	1.10 × 10-2	2022-04-29	n/a
	KR588	Rkatsiteli	Vitis vinifera Linne subsp. vinifera	+	2.44 × 10-2	26.97	n/a
	KR593	Rkatsiteli	Vitis vinifera Linne subsp. vinifera	+	1.56 × 10-1	24.81	n/a
	KR602	Rkatsiteli	Vitis vinifera Linne subsp. vinifera	+	4.09 × 10-2	31.06	n/a
	KR605	Rkatsiteli	Vitis vinifera Linne subsp. vinifera	+	2.89 × 10-2	28.21	n/a
	KR620	Pervenec Magaracha	Vitis vinifera х (Vitis vinifera x (Vitis vinifera + Vitis riparia + Vitis rupestris))	-	1.07 × 10-1	2022-04-27	n/a
	KR625	Krasnostop Zolotovsky	Vitis vinifera Linne subsp. vinifera	-	1.78 × 10-1	26.66	GLRaV-3
	KR634	Frankovka	Vitis vinifera Linne subsp. vinifera	-	1.48 × 10-1	25.31	n/a
	KR637	Saperavi	Vitis vinifera Linne subsp. vinifera	-	1.00 × 10-1	26.41	n/a
	KR1495	Blaufraenkisch	Vitis vinifera Linne subsp. vinifera	-	6.86 × 10-1	2022-06-27	n/a
	384lib	Merlot	Vitis vinifera Linne subsp. vinifera	+	1.17 × 10-1	26.35	GRSPaV, GFkV
	393lib	Isabella	Vitis Labrusca linne x Meslier Petit	+	2.33 × 10-1	24.94	GRSPaV, GFkV, GLRaV-1
	409lib	Syrah	Vitis vinifera Linne subsp. vinifera	+	6.98 × 10-2	2022-11-26	GRSPaV
	508lib	Augustine	Vitis vinifera х (Vitis vinifera + Vitis labrusca + Vitis rupestris + Vitis berlandieri + Vitis lincecumii)	+	3.51 × 10-2	26.27	GRSPaV, GFkV
	1524lib	Moldova	Guzal Kara x Villard Blanc	+	6.83 × 10-2	26.91	GRSPaV
	*n/a - samples were tested for presence of GRSPaV, GVA, GLRaV-1, GLRaV-2, GLRaV-3, GFLV and GFkV but these viruses were not detected

## Sheet: Table S3
Supplementary materials, Shvets and Vinogradova, 2022. Occurrence and Genetic Characterization of Grapevine Pinot Gris Virus in Russia
Supplementary TableS 3. Amplified sequences of viruses uploaded into GenBank with their identifier
Isolate	GenBank identifier	Closest genome	Pairwise identity, %	Country
RC48	OM925754	BK011064.1	99.38%	Italy
RC50	OM973969	BK011064.1	99.25%	Italy
RC104	OM973970	BK011064.1	98.88%	Italy
RC106	OM973971	BK011064.1	98.88%	Italy
RC110	OM973972	BK011090.1	98.62%	Italy
RC113	OM973973	BK011064.1	98.94%	Italy
RC119	OM973974	BK011064.1	98.50%	Italy
RC129	OM973975	BK011064.1	98.75%	Italy
RC149	OM973976	BK011064.1	99.31%	Italy
RC167	OM973977	BK011064.1	99.12%	Italy
RC183	OM973978	BK011064.1	99.06%	Italy
RC185	ON013499	BK011064.1	98.81%	Italy
RC218	OM973979	KF134125.1	98.75%	Slovakia
RC234	OM973980	BK011064.1	99.00%	Italy
RC240	OM973988	BK011064.1	98.50%	Italy
RC246	OM973981	BK011064.1	99.38%	Italy
RC249	OM973982	BK011064.1	99.12%	Italy
RC251	OM973983	BK011064.1	99.12%	Italy
RC253	OM973984	BK011064.1	98.81%	Italy
RC254	OM973985	BK011064.1	99.06%	Italy
RC257	OM973986	BK011064.1	98.88%	Italy
RC258	OM973987	BK011064.1	98.88%	Italy
RC265	ON013445	BK011064.1	98.88%	Italy
RC274	ON013446	BK011064.1	99.06%	Italy
RC281	ON013447	KY706085.1	98.12%	France
RC282	ON013448	MT414711.1	98.12%	Greece
RC287	ON013449	MT414711.1	98.44%	Greece
RC288	ON013450	MH087443.1	98.50%	Italy
RC290	ON013451	BK011090.1	98.00%	Italy
RC301	ON013452	BK011064.1	99.06%	Italy
RC309	ON013475	BK011064.1	98.50%	Italy
RC311	ON013476	BK011064.1	98.69%	Italy
RC326	ON013453	BK011064.1	99.38%	Italy
RC336	ON013454	BK011064.1	98.69%	Italy
RC338	ON013455	BK011064.1	99.25%	Italy
RC339	ON013456	BK011064.1	99.25%	Italy
RC346	ON013457	BK011064.1	98.81%	Italy
RC352	ON013458	BK011064.1	99.19%	Italy
RC408	ON013459	BK011064.1	99.06%	Italy
RC445	ON013460	BK011064.1	99.19%	Italy
RC446	ON013461	BK011064.1	98.75%	Italy
RC473	ON013462	BK011064.1	99.19%	Italy
RC511	ON013463	BK011064.1	98.38%	Italy
RC545	ON013464	BK011064.1	99.25%	Italy
RC561	ON013465	BK011064.1	99.19%	Italy
RC595	ON013466	BK011064.1	98.88%	Italy
RC610	ON013467	BK011064.1	98.81%	Italy
RC632	ON013468	BK011064.1	99.25%	Italy
RC639	ON013469	BK011064.1	98.94%	Italy
RC648	ON013470	BK011064.1	99.19%	Italy
RC728	ON013471	BK011064.1	98.69%	Italy
RC750	ON013472	BK011064.1	98.81%	Italy
RC775	ON013473	BK011064.1	99.12%	Italy
RC779	ON013474	BK011064.1	98.88%	Italy
RC806	ON013477	BK011064.1	98.88%	Italy
RC827	ON013478	BK011064.1	99.06%	Italy
RC845	ON013479	BK011064.1	99.25%	Italy
RC868	ON013480	BK011064.1	98.56%	Italy
RC869	ON013481	BK011064.1	98.56%	Italy
RC882	ON013482	BK011064.1	98.69%	Italy
RC904	ON013483	BK011064.1	99.12%	Italy
RC907	ON013484	BK011064.1	99.31%	Italy
RC908	ON013485	BK011064.1	99.44%	Italy
RC919	ON013486	BK011064.1	99.44%	Italy
RC927	ON013487	BK011064.1	99.06%	Italy
RC931	ON013488	BK011064.1	99.19%	Italy
RC935	ON013489	BK011096.1	99.12%	Italy
RC1003	ON013490	BK011064.1	99.06%	Italy
RC1249	ON013491	BK011064.1	99.06%	Italy
RC1252	ON013492	BK011064.1	99.25%	Italy
RC1254	ON013493	BK011064.1	99.06%	Italy
RC1272	ON013494	BK011064.1	98.94%	Italy
RC1637	ON013495	BK011064.1	98.94%	Italy
RC1648	ON013496	BK011064.1	98.56%	Italy
RC1661	ON013497	BK011064.1	99.00%	Italy
RC1681	ON013498	BK011064.1	99.00%	Italy
ST1852	ON013518	BK011064.1	99.00%	Italy
ST1859	ON013519	BK011064.1	99.06%	Italy
KR1909	ON013520	BK011064.1	99.06%	Italy
KR1912	ON013521	BK011064.1	98.62%	Italy
KR1921	ON013522	BK011064.1	99.06%	Italy
KR21	ON013523	BK011064.1	98.88%	Italy
KR40	ON013524	BK011064.1	99.25%	Italy
KR103	ON013525	BK011090.1	98.88%	Italy
KR130	ON013526	BK011071.1	98.69%	Italy
KR145	ON013527	BK011064.1	98.75%	Italy
KR203	ON013528	BK011064.1	98.50%	Italy
KR236	ON013529	BK011064.1	98.69%	Italy
KR238	ON013530	BK011064.1	99.31%	Italy
KR267	ON013531	KY706085.1	98.75%	France
KR281	ON013532	BK011071.1	97.94%	Italy
KR285	ON013533	KY706085.1	98.12%	France
KR293	ON013534	BK011064.1	98.31%	Italy
KR316	ON013535	BK011064.1	99.50%	Italy
KR337	ON013536	BK011064.1	98.50%	Italy
KR360	ON013537	BK011064.1	99.06%	Italy
KR383	ON013538	BK011064.1	97.75%	Italy
KR408	ON013539	BK011064.1	98.75%	Italy
KR416	ON013540	BK011064.1	99.06%	Italy
KR487	ON013541	BK011064.1	98.81%	Italy
KR493	ON013542	BK011064.1	99.56%	Italy
KR504	ON013543	BK011064.1	99.06%	Italy
KR563	ON013544	BK011064.1	99.19%	Italy
KR573	ON013545	BK011064.1	98.62%	Italy
KR579	ON033799	BK011064.1	99.38%	Italy
KR588	ON033800	BK011064.1	99.38%	Italy
KR593	ON033801	BK011064.1	99.06%	Italy
KR602	ON033802	BK011064.1	98.81%	Italy
KR605	ON033803	BK011064.1	98.88%	Italy
KR620	ON033804	BK011064.1	98.50%	Italy
KR625	ON033805	BK011101.1	98.94%	Italy
KR634	ON033806	BK011064.1	99.00%	Italy
KR637	ON033807	BK011064.1	99.06%	Italy
KR1495	ON033808	BK011064.1	98.44%	Italy
384lib	ON033809	BK011064.1	99.19%	Italy
393lib	ON033810	BK011064.1	98.88%	Italy
409lib	ON033811	BK011064.1	98.69%	Italy
508lib	ON033812	BK011064.1	98.81%	Italy
1524lib	ON033813	BK011064.1	98.44%	Italy

## Sheet: Table S4
Supplementary materials, Shvets and Vinogradova, 2022. Occurrence and Genetic Characterization of Grapevine Pinot Gris Virus in Russia
Supplementary Table S4. The pairwise identity matrix of nucleotide sequences among Russian isolates. Mean values of identity score are shown to the right of the matrix in the order of increasing. Divergent isolates and their identity scores are shown in blue colour; similar isolates are shown in red colour
>RC48	100.001
>RC50	99.301	100.001
>RC104	98.701	98.601	100.001
>RC106	98.601	98.401	98.001	100.001
>RC110	98.601	98.501	98.101	97.801	100.001
>RC113	98.901	98.801	98.301	98.101	98.201	100.001
>RC119	98.101	98.001	98.101	97.801	97.401	97.901	100.001
>RC129	98.601	98.401	98.101	98.101	97.901	98.101	97.601	100.001
>RC149	98.901	98.801	98.401	98.401	98.301	98.601	98.101	98.301	100.001
>RC167	99.101	99.101	98.401	98.301	98.901	98.701	98.001	98.301	98.801	100.001
>RC183	99.101	98.801	98.301	98.401	98.301	98.501	97.801	98.201	98.801	98.801	100.001
>RC185	98.401	98.301	98.301	98.101	97.801	98.101	97.801	97.901	98.401	98.201	98.301	100.001
>RC218	98.801	98.601	98.301	97.901	98.301	98.501	97.501	98.001	98.301	98.501	98.301	97.901	100.001
>RC234	99.001	98.901	98.301	98.101	98.301	98.801	97.901	98.101	98.601	98.801	98.701	98.101	98.401	100.001
>RC240	98.201	98.101	97.701	97.801	97.401	97.801	97.301	97.601	98.101	97.901	97.901	97.801	97.701	97.901	100.001
>RC246	99.001	98.901	98.501	98.601	98.301	98.601	98.101	98.401	98.901	98.801	98.701	98.401	98.401	98.901	98.101	100.001
>RC249	98.901	98.801	98.301	98.401	98.301	98.501	97.901	98.301	98.801	98.701	98.601	98.301	98.301	98.601	97.901	98.801	100.001
>RC251	99.001	99.001	98.301	98.401	98.301	98.601	97.901	98.101	98.701	98.801	98.801	98.401	98.401	98.601	98.301	98.801	98.701	100.001
>RC253	98.401	98.401	98.101	98.101	97.801	98.001	97.701	97.901	98.601	98.401	98.301	98.301	97.901	98.101	97.801	98.601	98.301	98.201	100.001
>RC254	98.701	98.601	98.201	98.301	98.201	98.301	98.201	98.201	98.601	98.601	98.401	98.101	98.201	98.301	97.901	98.801	98.501	98.401	98.301	100.001
>RC257	98.801	98.801	98.101	98.101	98.101	98.301	97.601	97.901	98.601	98.501	98.601	98.101	98.101	98.401	97.801	98.501	98.601	98.601	98.001	98.201	100.001
>RC258	98.501	98.401	98.301	98.101	97.901	98.101	97.801	98.101	98.401	98.301	98.201	98.301	98.301	98.101	97.701	98.501	98.301	98.301	98.201	98.201	98.301	100.001
>RC265	98.901	98.801	98.201	98.101	98.101	98.601	97.601	98.001	98.401	98.701	98.601	98.201	98.301	98.501	97.901	98.501	98.401	98.601	98.101	98.201	98.401	98.101	100.001
>RC274	99.101	98.901	98.401	98.201	98.401	98.601	97.801	98.201	98.601	98.801	98.601	98.101	98.601	98.801	97.901	98.701	98.601	98.701	98.101	98.501	98.401	98.201	98.601	100.001
>RC281	97.401	97.301	96.901	97.101	96.801	97.101	96.801	97.001	97.401	97.301	97.201	96.801	96.901	97.301	96.701	97.501	97.201	97.101	97.001	97.101	97.301	97.301	96.901	97.101	100.001
>RC282	97.001	96.801	96.501	96.801	96.301	96.801	96.301	96.801	96.701	96.601	96.901	96.801	96.601	96.801	96.301	96.901	96.801	96.601	96.401	96.401	96.401	96.901	96.501	96.601	96.601	100.001
>RC287	97.301	97.201	96.901	97.201	96.701	97.001	96.601	97.101	97.401	97.101	97.401	97.101	97.201	96.901	96.801	97.401	97.301	97.201	97.001	97.101	97.101	97.201	96.901	97.001	97.201	97.801	100.001
>RC288	97.501	97.501	97.101	97.301	97.101	97.201	97.001	97.301	97.601	97.401	97.301	97.201	97.101	97.101	96.801	97.501	97.301	97.401	97.101	97.301	97.101	97.401	97.001	97.201	97.801	96.901	97.201	100.001
>RC290	97.601	97.601	97.301	97.501	97.101	97.401	97.001	97.301	97.601	97.401	97.601	97.301	97.301	97.401	97.201	97.601	97.801	97.601	97.201	97.301	97.401	97.301	97.401	97.401	96.901	97.301	97.601	97.101	100.001
>RC301	99.101	99.101	98.401	98.301	98.401	98.601	97.801	98.201	98.901	98.901	98.901	98.301	98.401	98.701	98.001	98.701	98.701	98.901	98.301	98.401	98.601	98.201	98.801	98.901	97.101	96.701	97.101	97.401	97.401	100.001
>RC309	98.501	98.301	97.701	97.801	97.901	97.901	97.401	97.601	98.201	98.301	98.601	97.901	97.901	98.301	97.401	98.101	98.101	98.301	97.701	97.901	98.101	97.601	98.301	98.101	96.601	96.301	96.601	96.801	97.001	98.301	100.001
>RC311	98.601	98.601	98.301	97.801	97.801	98.101	97.601	97.701	98.301	98.301	98.301	97.901	98.101	98.201	97.501	98.301	98.301	98.301	97.901	98.001	98.301	98.001	98.101	98.301	96.901	96.401	96.901	96.901	97.101	98.301	97.701	100.001
>RC326	99.401	99.301	99.001	98.501	98.601	98.901	98.101	98.601	98.901	99.101	98.901	98.401	98.801	99.001	98.301	99.001	98.901	99.001	98.501	98.701	98.901	98.501	98.901	99.101	97.501	96.901	97.401	97.501	97.801	99.101	98.401	98.901	100.001
>RC336	98.701	98.701	98.101	97.901	98.301	98.301	97.401	97.901	98.401	98.701	98.601	98.001	98.301	98.301	97.801	98.301	98.301	98.601	98.101	98.101	98.201	97.901	98.301	98.401	97.001	96.301	96.801	97.101	97.101	98.801	98.101	97.901	98.701	100.001
>RC338	99.301	99.101	98.601	98.801	98.501	98.801	98.101	98.401	98.801	99.101	98.801	98.301	98.601	99.001	98.101	99.001	98.801	98.901	98.401	98.701	98.801	98.501	98.801	98.901	97.301	96.901	97.301	97.401	97.501	98.901	98.301	98.501	99.301	98.601	100.001
>RC339	99.201	99.101	98.601	98.401	98.701	98.801	98.101	98.501	98.801	99.201	98.901	98.401	98.601	98.901	98.101	98.901	98.801	98.801	98.301	98.801	98.601	98.401	98.701	98.901	97.401	96.901	97.201	97.401	97.601	98.901	98.401	98.401	99.201	98.601	99.101	100.001
>RC346	98.401	98.301	97.901	97.901	97.901	98.001	97.601	98.001	98.401	98.301	98.101	97.901	97.901	98.101	97.601	98.601	98.301	98.201	98.101	98.401	97.901	97.901	98.201	98.301	96.901	96.301	96.801	97.101	97.201	98.101	97.601	97.801	98.601	97.901	98.301	98.301	100.001
>RC352	99.101	99.001	98.501	98.301	98.601	98.701	98.101	98.401	98.801	99.101	98.801	98.401	98.501	98.901	98.101	98.801	98.801	98.801	98.301	98.801	98.501	98.301	98.601	98.801	97.301	96.901	97.201	97.301	97.601	98.801	98.401	98.301	99.101	98.601	99.001	99.901	98.301	100.001
>RC408	99.101	98.901	98.701	98.301	98.401	98.601	97.801	98.201	98.801	98.901	98.601	98.101	98.401	98.701	97.901	98.701	98.601	98.701	98.101	98.401	98.601	98.201	98.601	98.901	97.201	96.601	97.001	97.201	97.401	98.801	98.101	98.601	99.601	98.501	99.101	99.001	98.101	98.901	100.001
>RC445	99.101	98.901	98.401	98.401	98.401	98.601	97.901	98.401	98.901	98.901	98.901	98.401	98.401	98.701	98.101	98.901	98.801	98.801	98.401	98.501	98.601	98.301	98.701	98.801	97.301	97.001	97.301	97.501	97.701	99.001	98.301	98.301	99.101	98.601	98.901	98.901	98.401	98.901	98.801	100.001
>RC446	98.401	98.301	97.901	98.101	97.901	98.001	97.801	98.001	98.301	98.301	98.101	97.901	97.901	98.001	97.601	98.401	98.301	98.101	98.101	98.401	97.901	97.901	97.901	98.101	97.101	96.301	96.801	97.301	97.101	98.101	97.601	97.701	98.401	97.901	98.301	98.501	97.901	98.401	98.101	98.201	100.001
>RC473	98.901	98.701	98.301	98.601	98.101	98.401	97.901	98.401	98.801	98.601	98.601	98.301	98.301	98.401	98.101	98.801	98.601	98.601	98.401	98.501	98.301	98.301	98.401	98.501	97.401	96.801	97.301	97.601	97.601	98.501	98.101	98.101	98.801	98.301	98.701	98.701	98.401	98.601	98.501	98.601	98.301	100.001
>RC511	98.401	98.401	97.701	97.601	97.901	98.101	97.101	97.601	98.201	98.301	97.901	97.401	97.901	98.001	97.201	98.101	98.101	98.001	97.501	97.801	98.301	97.801	97.901	98.101	96.901	96.001	96.401	96.901	96.801	98.101	97.501	97.801	98.401	97.801	98.401	98.301	97.401	98.301	98.101	98.101	97.601	97.901	100.001
>RC545	98.901	98.801	98.401	98.401	98.101	98.401	98.001	98.301	98.801	98.601	98.701	98.301	98.301	98.501	98.101	98.901	98.701	98.801	98.301	98.601	98.401	98.401	98.401	98.601	97.301	96.601	97.301	97.401	97.501	98.601	98.001	98.301	98.901	98.201	98.801	98.801	98.301	98.701	98.601	98.701	98.301	98.701	98.001	100.001
>RC561	99.201	99.101	98.501	98.401	98.601	98.801	98.101	98.601	98.901	99.101	98.901	98.301	98.701	98.801	98.001	98.801	98.801	98.801	98.401	98.501	98.601	98.301	98.701	98.901	97.301	96.701	97.101	97.601	97.701	99.001	98.301	98.401	99.201	98.801	99.101	99.001	98.301	98.901	98.901	99.001	98.301	98.801	98.401	98.701	100.001
>RC595	98.501	98.501	98.501	98.401	97.801	98.101	98.301	98.001	98.401	98.301	98.201	98.201	98.001	98.101	97.801	98.601	98.401	98.401	98.301	98.301	98.101	98.301	98.001	98.201	97.001	96.501	96.901	97.301	97.101	98.301	97.601	97.901	98.501	97.901	98.601	98.401	97.901	98.301	98.301	98.401	98.101	98.301	97.601	98.401	98.301	100.001
>RC610	98.401	98.301	97.901	98.101	97.801	98.101	97.601	97.901	98.401	98.301	98.301	97.901	97.901	98.201	97.801	98.401	98.301	98.201	98.401	98.101	97.901	98.201	98.101	98.101	96.901	96.701	96.901	97.101	97.201	98.101	97.801	97.801	98.501	97.801	98.401	98.401	98.101	98.301	98.301	98.301	98.101	98.301	97.401	98.301	98.301	98.201	100.001
>RC632	99.301	99.301	98.601	98.401	98.501	98.901	98.001	98.501	98.801	99.001	98.901	98.301	98.601	98.901	98.101	98.901	98.801	98.901	98.401	98.601	98.601	98.401	98.801	98.901	97.301	96.801	97.301	97.401	97.601	98.901	98.301	98.401	99.301	98.601	99.101	99.101	98.401	99.001	98.901	99.101	98.301	98.701	98.301	98.801	99.101	98.401	98.301	100.001
>RC639	98.801	98.901	98.201	98.101	98.101	98.501	97.601	98.101	98.401	98.601	98.401	97.901	98.201	98.401	97.601	98.401	98.401	98.601	97.901	98.101	98.301	98.101	98.301	98.501	96.901	96.601	96.901	97.201	97.201	98.601	97.801	98.201	98.901	98.301	98.801	98.601	97.901	98.601	98.601	98.601	97.901	98.601	98.001	98.301	98.801	98.201	98.001	98.801	100.001
>RC648	98.801	98.701	98.901	98.301	98.201	98.401	98.401	98.201	98.901	98.701	98.601	98.501	98.201	98.401	97.901	98.801	98.601	98.601	98.501	98.501	98.301	98.401	98.301	98.501	97.201	96.601	97.101	97.401	97.401	98.601	98.101	98.101	98.801	98.401	98.701	98.701	98.301	98.601	98.501	98.801	98.201	98.601	97.801	98.701	98.801	98.801	98.301	98.701	98.301
>RC728	98.301	98.201	98.001	98.101	97.801	97.901	97.601	97.801	98.501	98.201	98.301	98.001	97.901	98.001	97.501	98.301	98.401	98.101	97.901	98.101	98.101	97.901	97.901	98.001	97.101	96.201	96.901	97.101	97.201	98.101	97.801	97.601	98.301	98.001	98.301	98.201	97.901	98.101	98.101	98.301	97.801	98.301	97.701	98.201	98.401	98.101	97.901	98.301	97.901
>RC750	98.801	98.701	98.101	98.101	98.401	98.501	97.601	98.101	98.401	98.801	98.401	97.901	98.201	98.701	97.801	98.601	98.501	98.601	98.001	98.401	98.301	97.901	98.301	98.501	96.901	96.501	96.901	97.101	97.301	98.501	97.901	98.001	98.801	98.301	98.801	98.901	97.901	98.801	98.601	98.601	97.901	98.301	98.101	98.301	98.801	98.101	98.001	98.701	98.301
>RC775	99.101	99.001	98.401	98.401	98.501	98.701	97.901	98.301	98.701	99.001	98.801	98.301	98.601	98.801	98.101	98.901	98.701	98.901	98.201	98.401	98.601	98.401	98.801	98.801	97.301	97.101	97.601	97.301	97.601	98.901	98.301	98.301	99.101	98.701	99.001	99.101	98.201	99.101	98.901	98.901	98.101	98.601	98.101	98.601	98.901	98.301	98.201	99.001	98.701
>RC779	98.701	98.601	98.101	98.101	97.901	98.301	97.801	98.001	98.401	98.401	98.501	98.101	98.101	98.601	97.901	98.601	98.401	98.601	98.101	98.201	98.401	98.001	98.301	98.501	97.001	96.601	97.001	97.101	97.601	98.501	98.101	98.101	98.801	98.101	98.601	98.601	98.101	98.601	98.501	98.701	97.901	98.301	97.701	98.501	98.501	98.001	98.101	98.701	98.101
>RC806	98.801	98.601	98.101	98.101	98.001	98.601	97.601	98.001	98.401	98.601	98.501	98.101	98.101	98.801	97.801	98.601	98.401	98.501	98.101	98.201	98.301	98.001	98.501	98.501	97.001	96.601	97.101	97.101	97.401	98.601	97.901	97.901	98.801	98.201	98.601	98.601	98.101	98.601	98.601	98.701	97.901	98.401	97.801	98.401	98.601	98.001	98.101	98.601	98.201
>RC827	99.001	98.901	98.401	98.301	98.401	98.601	97.901	98.301	98.701	98.901	98.701	98.201	98.401	98.601	98.101	98.801	98.601	98.601	98.201	98.601	98.401	98.201	98.501	98.701	97.101	96.601	97.101	97.201	97.401	98.701	98.101	98.201	99.001	98.301	99.001	99.301	98.101	99.301	98.801	98.801	98.301	98.501	98.101	98.601	98.801	98.301	98.301	98.901	98.401
>RC845	99.301	99.101	98.601	98.401	98.601	99.001	98.001	98.401	98.801	99.001	98.801	98.301	98.801	98.901	98.101	98.901	98.901	98.901	98.301	98.601	98.701	98.401	98.901	99.101	97.401	96.801	97.201	97.401	97.601	99.001	98.301	98.401	99.301	98.601	99.101	99.101	98.301	99.001	98.901	98.901	98.301	98.701	98.401	98.801	99.101	98.401	98.301	99.201	98.801
>RC868	98.401	98.201	97.701	97.801	97.701	97.901	97.401	97.701	98.401	98.101	98.001	97.601	97.701	97.901	97.401	98.201	98.001	98.101	97.901	98.001	97.901	97.901	97.701	98.001	96.901	96.101	96.501	97.201	96.901	98.101	97.401	97.701	98.201	97.901	98.201	98.101	97.801	98.001	98.001	98.101	97.701	98.301	97.601	98.101	98.501	97.901	97.801	98.101	97.901
>RC869	98.401	98.201	97.701	97.801	97.701	97.901	97.401	97.701	98.401	98.101	98.001	97.601	97.701	97.901	97.401	98.201	98.001	98.101	97.901	98.001	97.901	97.901	97.701	98.001	96.901	96.101	96.501	97.201	96.901	98.101	97.401	97.701	98.201	97.901	98.201	98.101	97.801	98.001	98.001	98.101	97.701	98.301	97.601	98.101	98.501	97.901	97.801	98.101	97.901
>RC882	98.801	98.601	98.101	97.901	98.101	98.301	97.701	97.901	98.301	98.401	98.401	97.901	98.201	98.401	97.801	98.301	98.301	98.601	97.801	98.001	98.101	97.801	98.201	98.501	96.801	96.201	96.601	97.101	96.901	98.401	97.801	97.901	98.701	98.001	98.601	98.501	97.801	98.401	98.401	98.401	97.801	98.401	97.801	98.301	98.601	97.901	97.801	98.601	98.401
>RC904	98.801	98.601	98.301	98.401	98.001	98.301	98.001	98.101	98.701	98.601	98.401	98.201	98.401	98.401	98.101	98.801	98.601	98.601	98.201	98.401	98.301	98.301	98.301	98.401	97.401	96.801	97.301	97.501	97.601	98.401	98.001	98.201	98.801	98.101	98.801	98.601	98.201	98.601	98.601	98.601	98.301	98.701	97.901	98.601	98.601	98.401	98.301	98.601	98.301
>RC907	99.101	98.901	98.501	98.501	98.301	98.601	98.101	98.401	98.901	98.801	98.801	98.401	98.401	98.701	98.101	99.101	98.801	98.801	98.401	98.601	98.601	98.401	98.601	98.801	97.401	96.701	97.301	97.501	97.601	98.801	98.301	98.401	99.101	98.401	98.901	98.901	98.401	98.801	98.901	98.801	98.401	98.801	98.301	98.901	98.901	98.401	98.501	99.101	98.601
>RC908	99.401	99.301	98.801	98.701	98.701	99.001	98.201	98.601	99.001	99.201	99.001	98.501	98.901	99.101	98.301	99.101	99.001	99.101	98.501	98.801	98.801	98.601	98.901	99.101	97.401	96.901	97.401	97.601	97.801	99.101	98.401	98.601	99.401	98.801	99.301	99.301	98.501	99.201	99.101	99.101	98.401	99.001	98.501	98.901	99.301	98.601	98.601	99.301	98.901
>RC919	99.401	99.301	98.801	98.601	98.701	99.001	98.201	98.601	99.001	99.201	99.001	98.501	98.901	99.101	98.401	99.101	99.001	99.101	98.501	98.801	98.801	98.601	98.901	99.101	97.601	97.301	97.601	98.001	97.901	99.101	98.401	98.601	99.401	98.801	99.301	99.301	98.501	99.201	99.101	99.101	98.601	99.001	98.401	98.901	99.301	98.601	98.601	99.301	98.901
>RC927	98.701	98.601	98.301	98.201	98.101	98.301	98.101	98.201	98.601	98.401	98.401	98.301	98.101	98.301	97.801	98.701	98.601	98.401	98.101	98.401	98.201	98.201	98.201	98.401	97.101	96.601	97.101	97.201	97.601	98.401	97.801	98.001	98.701	98.101	98.601	98.601	98.201	98.501	98.501	98.501	98.301	98.501	97.701	98.701	98.601	98.401	98.301	98.601	98.101
>RC931	98.901	98.701	98.401	98.401	98.201	98.401	97.901	98.301	98.801	98.701	98.901	98.501	98.301	98.401	98.101	98.801	98.601	98.801	98.401	98.501	98.401	98.401	98.401	98.501	97.401	96.901	97.501	97.601	97.701	98.601	98.201	98.101	98.801	98.501	98.701	98.701	98.301	98.601	98.501	98.801	98.201	99.101	97.901	98.801	98.601	98.301	98.301	98.701	98.401
>RC935	98.501	98.501	98.301	98.101	98.301	98.101	97.801	98.001	98.401	98.301	98.201	98.201	98.001	98.101	97.701	98.601	98.401	98.401	98.101	98.201	98.101	98.301	98.001	98.201	96.901	96.601	96.901	97.301	97.401	98.201	97.801	97.801	98.501	97.801	98.501	98.401	97.901	98.301	98.301	98.301	97.901	98.301	97.801	98.401	98.301	98.301	98.301	98.501	98.101
>RC1003	99.001	98.901	98.501	98.301	98.401	98.701	97.901	98.301	98.601	98.801	98.601	98.301	98.801	98.601	98.001	98.701	98.701	98.601	98.201	98.401	98.401	98.401	98.501	98.701	97.101	96.901	97.101	97.301	97.501	98.701	98.101	98.301	99.001	98.401	99.001	98.901	98.101	98.901	98.701	98.801	98.101	98.501	98.101	98.601	98.801	98.301	98.101	98.901	98.401
>RC1249	98.701	98.601	98.701	98.201	97.901	98.301	98.301	98.101	98.601	98.401	98.601	98.301	98.101	98.401	97.801	98.801	98.501	98.401	98.101	98.401	98.301	98.401	98.201	98.401	97.301	96.701	97.101	97.301	97.601	98.401	97.901	98.001	98.701	98.101	98.601	98.801	98.101	98.801	98.401	98.501	98.101	98.501	97.801	98.601	98.601	98.801	98.101	98.601	98.101
>RC1252	98.901	98.801	98.501	98.501	98.101	98.401	98.001	98.401	98.901	98.601	98.601	98.601	98.301	98.601	98.001	99.001	98.801	98.601	98.601	98.601	98.401	98.601	98.401	98.601	97.401	96.601	97.301	97.501	97.601	98.601	98.001	98.201	98.901	98.301	98.801	98.801	98.301	98.701	98.601	98.701	98.401	98.801	98.101	98.801	98.801	98.401	98.301	98.801	98.401
>RC1254	99.101	98.901	98.401	98.401	98.301	98.801	97.801	98.201	98.601	98.801	98.801	98.301	98.401	99.301	98.001	98.801	98.601	98.801	98.101	98.401	98.601	98.201	98.701	98.901	97.101	96.701	97.101	97.301	97.401	98.901	98.301	98.301	99.101	98.501	98.901	98.901	98.101	98.801	98.801	98.901	98.201	98.501	98.101	98.601	98.901	98.201	98.101	98.901	98.501
>RC1272	98.801	98.601	98.101	98.301	98.101	98.301	97.701	98.101	98.601	98.601	98.601	98.101	98.301	98.401	98.001	98.601	98.501	98.601	98.201	98.401	98.401	98.201	98.401	98.401	97.201	96.601	97.101	97.301	97.401	98.601	98.001	98.001	98.801	98.501	98.601	98.601	98.101	98.601	98.401	98.801	98.101	98.501	97.901	98.401	98.601	98.201	98.101	98.601	98.201
>RC1637	98.701	98.401	98.101	98.201	98.101	98.101	97.701	98.101	98.501	98.301	98.301	98.001	97.901	98.201	97.801	98.601	98.601	98.401	98.001	98.301	98.201	98.101	98.101	98.301	97.001	96.401	96.901	97.101	97.301	98.301	97.701	97.901	98.601	98.101	98.601	98.401	98.101	98.401	98.301	98.401	98.201	98.401	97.701	98.401	98.501	98.201	98.001	98.401	98.001
>RC1648	98.601	98.401	97.901	97.801	98.101	98.101	97.401	97.701	98.301	98.601	98.301	97.701	98.101	98.201	97.401	98.301	98.101	98.201	97.801	97.901	97.901	97.801	98.101	98.301	96.701	96.301	96.701	96.801	96.901	98.401	97.701	97.901	98.601	98.001	98.401	98.401	97.701	98.301	98.301	98.401	97.601	98.001	97.601	98.101	98.601	97.701	97.601	98.401	98.001
>RC1661	99.001	98.901	98.301	98.301	98.301	98.701	97.801	98.301	98.701	98.801	98.601	98.101	98.501	98.601	97.901	98.801	98.601	98.801	98.201	98.301	98.401	98.301	98.501	98.701	97.101	96.501	97.101	97.301	97.301	98.701	98.001	98.201	99.001	98.301	98.901	98.801	98.101	98.801	98.801	98.701	98.301	98.601	98.101	98.601	98.901	98.101	98.201	98.901	98.601
>RC1681	99.001	98.901	98.301	98.301	98.301	98.701	97.901	98.101	98.601	98.801	98.601	98.101	98.601	98.601	97.801	98.601	98.601	98.601	98.201	98.401	98.401	98.101	98.601	98.701	97.001	96.501	96.901	97.101	97.301	98.801	98.101	98.201	99.001	98.301	98.901	98.801	98.101	98.801	98.701	98.701	98.401	98.401	98.101	98.501	98.801	98.401	98.201	98.901	98.401
>KR1909	98.701	98.601	98.201	98.401	97.901	98.301	97.901	98.101	98.601	98.501	98.401	98.101	98.201	98.401	97.801	98.901	98.501	98.401	98.401	98.501	98.301	98.401	98.301	98.401	97.301	96.701	97.301	97.301	97.301	98.401	97.801	98.001	98.701	98.001	98.901	98.601	98.301	98.501	98.401	98.501	98.101	98.501	97.801	98.701	98.501	98.501	98.301	98.601	98.101
>KR1912	98.301	98.101	97.801	97.901	97.801	97.901	97.501	97.901	98.201	98.101	98.001	97.701	97.601	97.901	97.501	98.301	98.201	98.001	97.801	98.101	97.901	97.901	97.901	97.901	96.901	96.301	96.801	97.101	97.401	97.901	97.601	97.601	98.301	97.701	98.101	98.301	97.801	98.201	98.101	98.101	97.901	98.301	97.601	98.101	98.301	97.801	97.901	98.201	97.901
>KR1921	99.101	98.901	98.401	98.301	98.401	98.601	97.801	98.401	98.801	98.901	98.901	98.101	98.401	98.701	97.901	98.701	98.601	98.701	98.301	98.401	98.601	98.401	98.701	98.801	97.501	96.901	97.201	97.601	97.301	99.001	98.301	98.301	99.101	98.501	99.101	98.901	98.301	98.801	98.801	98.901	98.301	98.601	98.301	98.601	99.101	98.201	98.401	98.901	98.701
>ST1852	98.601	98.501	98.101	98.301	98.301	98.201	97.801	98.001	98.801	98.501	98.601	98.201	98.001	98.301	97.901	98.601	98.401	98.501	98.201	98.301	98.501	98.401	98.301	98.301	97.101	96.601	97.201	97.501	97.601	98.601	98.101	98.001	98.601	98.201	98.601	98.601	98.201	98.601	98.401	98.701	98.001	98.401	97.901	98.501	98.701	98.301	98.101	98.501	98.101
>ST1859	98.701	98.701	98.301	98.201	97.901	98.301	98.101	98.101	98.601	98.501	98.401	98.301	98.101	98.601	97.801	98.701	98.501	98.401	98.301	98.501	98.301	98.201	98.301	98.401	97.101	96.401	97.001	97.201	97.301	98.401	98.101	98.101	98.701	98.001	98.701	98.601	98.301	98.501	98.401	98.501	98.101	98.501	97.801	98.601	98.501	98.301	98.301	98.601	98.101
>KR21	98.701	98.701	98.401	98.101	98.101	98.301	97.601	98.001	98.401	98.401	98.301	98.001	98.301	98.401	97.901	98.601	98.301	98.401	97.901	98.201	98.301	98.101	98.301	98.401	96.901	96.601	96.901	97.001	97.201	98.401	97.801	98.001	98.701	98.301	98.601	98.601	97.901	98.501	98.401	98.501	98.001	98.301	97.801	98.501	98.501	98.001	97.901	98.601	98.101
>KR40	99.301	99.301	98.601	98.501	98.501	98.801	98.001	98.401	98.801	99.001	98.901	98.401	98.601	98.901	98.201	98.901	98.801	99.001	98.301	98.601	98.901	98.401	98.901	98.901	97.501	96.901	97.301	97.401	97.801	99.101	98.401	98.601	99.401	98.801	99.101	99.101	98.301	99.001	99.101	99.101	98.401	98.701	98.401	98.801	99.101	98.401	98.301	99.101	98.701
>KR103	98.801	98.601	98.401	98.101	98.401	98.401	97.801	98.401	98.601	98.601	98.401	98.401	98.401	98.401	97.801	98.501	98.701	98.401	98.301	98.201	98.301	98.401	98.301	98.601	97.001	96.901	96.901	97.401	97.401	98.701	97.901	98.201	98.801	98.301	98.601	98.601	97.901	98.601	98.401	98.801	98.101	98.401	98.001	98.401	98.801	98.401	97.901	98.601	98.401
>KR130	97.301	97.301	96.901	97.201	96.901	97.001	96.901	97.101	97.301	97.101	97.301	97.301	97.101	96.901	96.801	97.401	97.401	97.201	97.001	97.101	96.901	97.101	97.001	97.001	96.901	98.101	98.001	97.301	97.601	97.201	96.701	96.801	97.401	96.801	97.301	97.301	96.801	97.301	97.101	97.301	96.901	97.301	96.401	97.301	97.101	96.801	97.001	97.201	96.801
>KR145	98.401	98.301	97.901	98.101	97.901	98.101	97.501	97.901	98.301	98.101	98.201	98.101	97.901	98.001	97.701	98.401	98.401	98.301	97.801	98.101	98.101	98.001	98.101	98.101	96.901	96.601	96.901	97.001	97.401	98.201	97.801	97.701	98.401	97.801	98.301	98.401	97.901	98.301	98.101	98.401	97.801	98.201	97.601	98.301	98.401	97.901	98.001	98.301	97.801
>KR203	98.601	98.601	97.801	97.601	97.901	98.101	97.701	98.001	98.101	98.301	98.201	97.701	97.901	98.101	97.501	98.101	98.301	98.101	97.901	97.801	98.101	97.801	98.001	98.201	96.601	96.501	96.501	96.801	97.101	98.201	97.601	97.901	98.601	97.901	98.401	98.301	97.801	98.301	98.201	98.201	97.801	98.101	97.601	98.101	98.301	97.801	97.801	98.601	97.901
>KR236	98.701	98.601	97.901	98.101	97.901	98.101	97.401	97.801	98.401	98.401	99.501	97.901	97.901	98.301	97.701	98.301	98.301	98.601	97.901	98.001	98.301	97.801	98.201	98.301	96.801	96.601	96.901	97.101	97.201	98.601	98.201	97.901	98.601	98.301	98.401	98.501	97.801	98.401	98.301	98.501	97.701	98.301	97.601	98.301	98.501	97.901	97.901	98.601	98.101
>KR238	99.301	99.101	98.501	98.601	98.601	98.901	98.101	98.401	98.901	99.101	98.901	98.401	98.601	98.901	98.101	98.901	99.101	98.901	98.401	98.601	98.801	98.401	98.701	98.901	97.301	96.901	97.301	97.401	97.701	98.901	98.401	98.501	99.201	98.501	99.201	99.001	98.401	98.901	98.901	98.901	98.301	98.801	98.301	98.801	99.001	98.401	98.401	99.101	98.601
>KR267	97.701	97.601	97.201	97.601	96.901	97.401	96.901	97.301	97.601	97.401	97.601	97.101	97.301	97.401	96.901	97.801	97.501	97.601	97.401	97.501	97.301	97.601	97.201	97.401	98.101	97.001	97.401	98.201	97.301	97.401	96.901	97.101	97.701	97.101	97.701	97.701	97.101	97.601	97.401	97.601	97.301	97.801	97.001	97.601	97.601	97.401	97.301	97.701	97.301
>KR281	97.101	97.101	96.601	97.101	96.501	96.901	96.801	96.601	96.901	96.901	97.101	96.801	96.801	96.901	96.501	97.301	97.201	97.001	96.901	96.901	96.801	96.801	96.801	96.801	96.401	97.301	97.601	96.801	97.001	96.901	96.401	96.601	97.101	96.701	97.401	97.001	96.401	97.001	96.901	97.101	96.501	97.101	96.301	96.901	96.901	96.601	96.601	97.101	96.601
>KR285	97.401	97.301	96.901	97.201	96.701	97.101	96.601	97.101	97.301	97.101	97.201	96.801	96.901	97.001	96.701	97.501	97.301	97.301	96.901	97.201	97.101	97.101	97.001	97.101	97.401	96.401	97.201	97.801	96.901	97.101	96.601	96.801	97.401	96.801	97.401	97.301	96.801	97.201	97.201	97.301	96.901	97.401	96.801	97.401	97.301	97.101	96.901	97.301	96.901
>KR293	98.301	98.101	97.701	97.601	97.601	98.001	97.101	97.601	97.901	98.001	97.901	97.401	97.801	98.401	97.101	97.901	97.901	97.901	97.401	97.801	97.801	97.501	97.801	98.401	96.701	96.201	96.601	96.801	96.801	98.001	97.501	97.401	98.301	97.601	98.101	98.101	97.501	98.101	97.901	98.001	97.401	97.901	97.401	97.901	98.201	97.501	97.401	98.101	97.801
>KR316	99.301	99.201	98.701	98.601	98.601	98.901	98.301	98.501	99.101	99.101	99.101	98.601	98.701	98.901	98.301	99.101	99.101	99.101	98.601	98.801	98.901	98.601	98.801	99.001	97.501	96.901	97.501	97.601	97.901	99.001	98.401	98.601	99.301	98.601	99.201	99.201	98.601	99.101	99.001	99.001	98.501	98.901	98.401	99.001	99.101	98.601	98.601	99.301	98.801
>KR337	98.501	98.301	97.801	97.801	97.801	98.101	97.301	97.801	98.101	98.101	98.101	97.601	98.001	98.501	97.301	98.101	98.101	98.101	97.601	97.901	97.801	97.701	98.101	98.501	96.501	96.101	96.401	96.601	96.801	98.101	97.801	97.601	98.401	97.801	98.301	98.301	97.801	98.201	98.101	98.201	97.501	98.201	97.401	98.101	98.201	97.601	97.601	98.301	97.801
>KR360	98.801	98.701	98.301	98.301	97.901	98.301	97.801	98.201	98.601	98.401	98.601	98.301	98.201	98.401	97.901	98.701	98.501	98.601	98.301	98.401	98.301	98.201	98.301	98.501	97.101	96.701	97.101	97.201	97.401	98.501	98.201	98.201	98.801	98.301	98.601	98.601	98.101	98.501	98.501	98.601	98.101	98.901	97.801	98.701	98.601	98.201	98.101	98.701	98.301
>KR383	97.801	97.801	97.101	97.001	97.501	97.301	96.601	97.001	97.301	97.501	97.301	96.801	97.101	97.501	96.901	97.401	97.401	97.601	96.801	97.301	97.301	97.001	97.301	97.401	96.401	95.701	96.101	96.401	96.101	97.601	96.901	96.901	97.801	97.301	97.801	97.701	97.201	97.601	97.601	97.401	97.201	97.201	96.901	97.301	97.601	97.301	97.101	97.801	97.301
>KR408	98.401	98.301	98.001	98.301	97.601	97.901	97.601	97.801	98.301	98.101	98.201	98.101	97.901	98.001	97.901	98.401	98.201	98.401	97.801	98.101	98.301	98.001	98.101	98.101	97.601	97.001	97.501	97.901	97.801	98.201	97.701	97.801	98.401	97.801	98.401	98.301	97.801	98.201	98.101	98.301	97.901	98.301	97.601	98.301	98.201	98.101	97.801	98.301	97.801
>KR416	99.101	98.801	98.301	98.401	98.301	98.501	97.801	98.201	98.801	98.801	99.901	98.301	98.301	98.701	97.901	98.701	98.601	98.801	98.301	98.401	98.601	98.201	98.601	98.601	97.201	96.901	97.301	97.301	97.601	98.901	98.601	98.301	98.901	98.601	98.801	98.901	98.101	98.801	98.601	98.901	98.101	98.601	97.901	98.601	98.901	98.201	98.301	98.901	98.401
>KR487	98.901	98.601	98.101	98.201	98.101	98.301	97.701	98.001	98.501	98.601	99.801	98.101	98.101	98.501	97.901	98.401	98.401	98.601	98.101	98.101	98.301	98.001	98.401	98.401	96.901	96.801	97.101	97.101	97.301	98.701	98.301	98.101	98.801	98.401	98.601	98.701	97.901	98.601	98.401	98.701	97.801	98.401	97.801	98.401	98.701	98.001	98.001	98.701	98.201
>KR493	99.401	99.301	98.801	98.701	98.701	99.001	98.301	98.601	99.101	99.201	99.501	98.601	98.801	99.101	98.301	99.201	99.101	99.201	98.601	98.901	98.901	98.701	98.901	99.101	97.601	96.901	97.601	97.701	97.801	99.101	98.601	98.801	99.401	98.801	99.301	99.301	98.601	99.201	99.101	99.101	98.601	99.001	98.401	99.201	99.301	98.701	98.601	99.401	98.901
>KR504	99.101	98.901	98.401	98.301	98.301	98.601	97.901	98.401	98.601	98.801	98.601	98.101	98.401	98.701	97.901	98.701	98.601	98.701	98.101	98.401	98.401	98.201	98.601	98.801	97.301	96.701	97.101	97.401	97.701	98.901	98.101	98.301	99.101	98.401	98.901	98.901	98.201	98.801	98.801	98.801	98.201	98.601	98.201	98.601	99.101	98.201	98.101	98.901	98.601
>KR563	98.801	98.701	98.301	98.401	98.101	98.401	98.101	98.401	98.801	98.601	98.501	98.301	98.201	98.401	98.001	98.801	98.601	98.701	98.301	98.601	98.301	98.301	98.301	98.501	97.301	96.601	97.101	97.401	97.401	98.501	98.101	98.101	98.801	98.101	98.701	98.801	98.301	98.801	98.501	98.701	98.401	98.801	97.901	98.701	98.801	98.401	98.301	98.701	98.401
>KR573	98.401	98.301	97.901	97.901	97.701	98.001	97.401	97.901	98.201	98.101	98.101	97.801	97.801	98.101	97.401	98.401	98.201	98.101	97.801	98.001	97.901	97.901	97.901	98.101	96.901	96.101	96.801	97.101	97.101	98.101	97.501	97.801	98.401	97.701	98.301	98.301	97.901	98.201	98.101	98.201	97.701	98.201	97.401	98.101	98.301	97.801	97.701	98.401	97.901
>KR579	99.001	98.901	98.501	98.601	98.301	98.601	98.101	98.401	99.101	98.801	98.701	98.401	98.401	98.601	98.101	99.101	98.801	98.801	98.501	98.801	98.501	98.601	98.501	98.701	97.601	96.801	97.401	97.801	97.601	98.701	98.101	98.301	99.001	98.301	98.901	98.901	98.401	98.801	98.701	98.801	98.401	98.801	98.101	98.901	98.901	98.601	98.401	98.901	98.401
>KR588	99.001	98.901	98.501	98.801	98.401	98.601	98.101	98.501	99.101	98.901	98.901	98.601	98.401	98.601	98.101	99.001	98.801	98.801	98.601	98.701	98.601	98.601	98.501	98.701	97.601	96.801	97.401	98.001	97.601	98.801	98.301	98.301	99.001	98.401	98.901	98.901	98.401	98.801	98.701	98.901	98.801	98.901	98.301	98.901	99.101	98.801	98.401	98.901	98.601
>KR593	98.701	98.601	98.201	98.201	98.101	98.301	97.701	98.201	98.501	98.401	98.401	98.101	98.201	98.301	98.101	98.601	98.601	98.401	98.101	98.401	98.401	98.101	98.301	98.401	96.901	96.601	97.001	97.201	97.401	98.501	97.801	97.901	98.701	98.101	98.601	98.701	98.001	98.601	98.401	98.801	97.901	98.401	97.801	98.401	98.501	98.201	98.001	98.601	98.301
>KR602	98.601	98.501	98.001	98.101	97.801	98.101	97.701	97.901	98.401	98.301	98.501	97.901	98.101	98.301	97.801	98.401	98.401	98.301	97.901	98.201	98.001	98.201	98.101	98.301	97.101	96.601	96.901	97.001	97.101	98.301	97.801	97.901	98.601	98.001	98.401	98.601	97.901	98.501	98.301	98.401	97.901	98.301	97.601	98.401	98.401	98.101	97.901	98.601	98.101
>KR605	99.001	98.901	98.201	98.001	98.101	98.401	98.001	98.001	98.401	98.601	98.401	98.101	98.401	98.601	97.901	98.501	98.401	98.601	98.201	98.201	98.301	98.301	98.401	98.601	96.901	96.801	96.901	97.101	97.301	98.601	97.901	98.301	98.901	98.201	98.901	98.701	97.901	98.601	98.601	98.601	97.901	98.401	97.901	98.501	98.701	98.101	97.901	98.901	98.301
>KR620	98.301	98.101	97.601	97.801	97.401	97.801	97.301	97.601	98.101	97.901	97.901	97.601	97.801	97.801	97.301	98.301	98.101	97.901	97.701	97.801	97.601	97.601	97.801	97.801	96.601	96.401	96.801	97.001	97.101	97.801	97.601	97.401	98.101	97.601	98.001	98.001	97.601	97.901	97.901	97.901	97.601	98.401	97.101	98.101	97.901	97.601	97.701	98.001	97.901
>KR625	98.601	98.401	98.101	98.101	97.901	98.301	97.701	98.101	98.501	98.301	98.401	98.101	98.101	98.201	98.101	98.601	98.401	98.401	98.101	98.301	98.101	98.101	98.201	98.401	97.301	96.801	97.401	97.401	97.601	98.401	97.901	97.901	98.601	98.001	98.401	98.401	98.101	98.401	98.301	98.401	98.101	98.601	97.601	98.401	98.401	98.101	98.101	98.401	98.101
>KR634	98.601	98.501	98.101	98.101	98.001	98.301	97.901	98.001	98.801	98.501	98.601	98.101	98.001	98.501	97.801	98.801	98.401	98.401	98.201	98.301	98.401	98.401	98.101	98.401	97.101	96.501	96.901	97.401	97.401	98.601	97.901	98.001	98.601	98.101	98.801	98.601	98.101	98.601	98.401	98.601	98.001	98.401	97.901	98.501	98.701	98.301	98.201	98.501	98.101
>KR637	98.801	98.801	98.301	98.401	98.301	98.401	97.901	98.301	98.601	98.601	98.501	98.301	98.201	98.601	98.001	98.701	98.501	98.701	98.101	98.401	98.401	98.401	98.401	98.501	97.401	96.801	97.201	97.601	97.501	98.801	97.901	98.001	98.801	98.401	98.801	98.701	98.301	98.601	98.501	98.801	98.101	98.501	97.901	98.601	98.601	98.401	98.101	98.801	98.401
>KR1495	98.201	98.101	97.601	97.801	97.401	97.901	97.301	97.801	98.001	97.901	97.801	97.501	97.601	97.801	97.601	98.101	98.001	97.901	97.501	97.801	97.801	97.801	97.901	97.901	97.801	96.801	97.201	98.101	97.101	97.901	97.301	97.501	98.201	97.601	98.101	98.101	97.701	98.001	97.901	98.101	97.601	98.201	97.401	97.901	98.101	97.701	97.601	98.101	97.801
>384lib	99.001	98.901	98.401	98.601	98.601	98.601	97.901	98.201	98.801	98.901	99.001	98.401	98.401	98.601	98.101	98.901	98.801	98.901	98.401	98.601	98.601	98.301	98.601	98.701	97.301	96.801	97.501	97.401	97.601	98.801	98.301	98.301	99.001	98.601	99.001	99.101	98.501	99.001	98.801	98.901	98.301	98.601	98.001	98.701	98.801	98.401	98.501	99.001	98.401
>393lib	98.501	98.601	98.101	98.301	97.901	98.101	97.601	98.101	98.601	98.301	98.401	98.101	98.001	98.101	97.901	98.501	98.401	98.501	98.101	98.201	98.401	98.001	98.101	98.201	97.101	96.401	96.901	97.301	97.501	98.401	97.801	97.901	98.601	98.101	98.401	98.401	98.001	98.301	98.301	98.401	98.101	98.401	97.801	98.401	98.401	98.301	97.901	98.401	98.301
>409lib	98.301	98.201	98.301	98.201	97.701	97.901	97.801	97.801	98.401	98.101	98.101	98.101	97.801	97.901	97.601	98.301	98.101	98.201	97.801	98.001	98.301	98.201	98.001	98.001	96.901	96.601	96.901	97.101	97.301	98.201	97.601	97.601	98.301	97.801	98.301	98.201	97.801	98.101	98.001	98.401	97.801	98.101	97.701	98.201	98.101	98.401	97.801	98.201	97.901
>508lib	98.601	98.601	98.101	98.101	97.801	98.101	97.601	97.901	98.401	98.301	98.301	98.201	98.101	98.301	97.901	98.401	98.301	98.401	97.901	98.101	98.201	97.901	98.201	98.301	96.801	96.401	97.001	97.101	97.201	98.401	97.901	97.901	98.601	98.001	98.401	98.601	97.901	98.501	98.401	98.501	97.801	98.301	97.601	98.301	98.401	97.901	97.901	98.401	98.001
>1524lib	98.401	98.201	97.601	97.801	98.101	98.001	97.401	97.601	98.001	98.101	98.401	97.801	97.801	98.101	97.401	98.201	98.001	98.201	97.801	98.001	97.901	97.801	97.901	98.101	96.901	96.801	96.801	96.701	97.101	98.101	97.901	97.901	98.301	97.901	98.301	98.301	97.601	98.201	98.001	98.101	97.601	98.001	97.301	97.901	98.101	97.801	97.801	98.201	97.901
	>RC48	>RC50	>RC104	>RC106	>RC110	>RC113	>RC119	>RC129	>RC149	>RC167	>RC183	>RC185	>RC218	>RC234	>RC240	>RC246	>RC249	>RC251	>RC253	>RC254	>RC257	>RC258	>RC265	>RC274	>RC281	>RC282	>RC287	>RC288	>RC290	>RC301	>RC309	>RC311	>RC326	>RC336	>RC338	>RC339	>RC346	>RC352	>RC408	>RC445	>RC446	>RC473	>RC511	>RC545	>RC561	>RC595	>RC610	>RC632	>RC639
[truncated: 72 more columns]

## Sheet: Table S5
Supplementary materials, Shvets and Vinogradova, 2022. Occurrence and Genetic Characterization of Grapevine Pinot Gris Virus in Russia
Supplementary Table S5. Frequency of the identity scores for nucleotide MP/CP sequences, movement proteins (MPs) and coat proteins (CPs) of Russian GPGV isolates
Identity scores, %	MP/CP nucleotide sequences		MP amino acid sequences		CP amino acid sequences
	Frequency of identity scores	Frequency of identity scores, %	Frequency of identity scores	Frequency of identity scores, %	Frequency of identity scores	Frequency of identity scores, %
100	120	1.68067	156	2.18487	3078	43.1092
99.0-99.9	342	4.78992	1280	17.9272	3460	48.4594
98.0-98.9	4489	62.8711	3554	49.7759	391	5.47619
97.0-97.9	1809	25.3361	1712	23.9776	184	2.57703
96.0-96.9	378	5.29412	405	5.67227	27	0.378151
95.0-95.9	2	0.0280112	32	0.448179	-	-
94.0-94.9	-	-	1	0	-	-
Total	7140	1	7140	1	7140	1

## Sheet: Table S6
Supplementary materials, Shvets and Vinogradova, 2022. Occurrence and Genetic Characterization of Grapevine Pinot Gris Virus in Russia
Supplementary Table S6. The pairwise identity matrix of movement proteins’ amino acid sequences among Russian isolates. Mean values of identity score are shown to the right of the matrix in the order of increasing. Divergent isolates and its identity scores are shown blue colour
>RC48	100.001
>RC50	100.001	100.001
>RC104	98.701	98.701	100.001
>RC106	98.901	98.901	97.601	100.001
>RC110	99.501	99.501	98.701	98.401	100.001
>RC113	98.901	98.901	97.901	97.901	98.401	100.001
>RC119	98.401	98.401	98.101	97.301	97.901	97.601	100.001
>RC129	99.201	99.201	98.401	98.701	99.201	98.101	97.601	100.001
>RC149	99.501	99.501	98.101	98.401	99.501	98.901	97.901	98.701	100.001
>RC167	99.701	99.701	98.401	98.701	99.701	98.701	98.101	98.901	99.701	100.001
>RC183	99.501	99.501	98.101	98.901	99.501	98.401	97.901	98.701	99.501	99.701	100.001
>RC185	98.101	98.101	97.901	97.601	98.101	97.101	97.601	97.901	97.601	97.901	98.101	100.001
>RC218	98.701	98.701	98.101	97.601	98.701	98.101	97.301	98.401	98.101	98.401	98.101	97.301	100.001
>RC234	99.501	99.501	98.101	98.401	98.901	98.901	97.901	98.701	98.901	99.201	98.901	97.601	98.101	100.001
>RC240	98.901	98.901	97.601	98.401	98.401	97.901	97.601	98.101	98.401	98.701	98.901	97.901	97.601	98.401	100.001
>RC246	99.501	99.501	98.101	98.401	98.901	98.401	97.901	98.701	98.901	99.201	98.901	97.601	98.101	98.901	98.401	100.001
>RC249	98.901	98.901	97.601	98.401	98.701	97.901	97.301	98.101	98.701	98.901	98.701	97.101	97.601	98.401	97.901	98.401	100.001
>RC251	99.501	99.501	98.101	98.901	98.901	98.401	97.901	98.701	98.901	99.201	99.501	98.101	98.101	98.901	98.901	98.901	98.401	100.001
>RC253	98.901	98.901	97.601	97.901	98.901	97.901	97.901	98.101	98.901	99.201	98.901	97.601	98.101	98.401	98.101	98.401	98.101	98.401	100.001
>RC254	98.901	98.901	97.601	97.901	98.401	97.901	97.901	98.101	98.401	98.701	98.401	97.101	97.601	98.401	97.901	98.401	97.901	98.401	97.901	100.001
>RC257	99.501	99.501	98.101	98.901	98.901	98.401	97.901	98.701	98.901	99.201	99.501	98.101	98.101	98.901	98.901	98.901	98.401	99.501	98.401	98.401	100.001
>RC258	98.701	98.701	97.901	97.601	98.701	98.101	97.901	98.401	98.401	98.401	98.101	97.901	98.401	98.101	97.901	98.101	97.901	98.101	98.101	97.601	98.101	100.001
>RC265	98.701	98.701	97.301	98.101	98.101	97.901	97.101	97.901	98.101	98.401	98.701	97.301	97.301	98.401	98.701	98.101	97.901	98.701	97.601	97.601	98.701	97.901	100.001
>RC274	100.001	100.001	98.701	98.901	99.501	98.901	98.401	99.201	99.501	99.701	99.501	98.101	98.701	99.501	98.901	99.501	98.901	99.501	98.901	98.901	99.501	98.701	98.701	100.001
>RC281	98.401	98.401	97.101	97.901	97.901	97.301	96.801	98.101	97.901	98.101	97.901	96.501	97.101	97.901	97.601	97.901	97.301	98.101	97.301	97.301	97.901	97.101	97.101	98.401	100.001
>RC282	96.801	96.801	96.001	96.801	97.101	96.501	95.701	96.501	96.801	96.801	97.101	96.501	96.001	96.801	96.801	96.301	96.801	97.101	96.501	95.701	96.801	97.101	96.301	96.801	96.801	100.001
>RC287	97.301	97.301	96.501	96.801	97.601	96.501	95.701	97.101	97.301	97.301	97.601	96.501	96.501	96.801	97.101	96.801	96.801	97.601	96.501	96.501	97.301	97.101	96.501	97.301	97.301	97.901	100.001
>RC288	96.801	96.801	96.001	96.001	97.301	95.701	95.201	96.801	96.801	97.101	96.801	96.001	96.001	96.301	96.001	96.301	96.001	96.501	96.301	95.701	96.301	96.001	95.501	96.801	97.901	96.001	96.501	100.001
>RC290	98.701	98.701	97.901	98.101	98.701	97.601	97.101	98.401	98.101	98.401	98.701	97.901	97.901	98.101	98.401	98.101	97.901	98.901	97.601	97.601	98.701	97.901	97.901	98.701	98.101	97.601	98.101	97.101	100.001
>RC301	98.901	98.901	97.601	98.401	98.901	97.901	97.301	98.101	98.901	99.201	99.501	97.601	97.601	98.401	98.401	98.401	98.401	98.901	98.401	97.901	98.901	97.901	98.401	98.901	97.301	96.501	97.101	96.301	98.101	100.001
>RC309	98.401	98.401	97.001	97.801	98.401	97.301	97.301	97.601	98.401	98.601	98.901	97.001	97.301	97.801	97.801	97.801	97.601	98.401	97.801	98.101	98.601	97.001	97.601	98.401	96.801	96.201	96.801	95.701	97.601	98.401	100.001
>RC311	99.501	99.501	98.401	98.401	98.901	98.401	98.401	98.701	98.901	99.201	98.901	98.101	98.101	98.901	98.701	98.901	98.401	98.901	98.901	98.401	98.901	98.701	98.101	99.501	97.901	96.801	96.801	96.301	98.101	98.401	97.801	100.001
>RC326	99.701	99.701	98.901	98.701	99.201	98.701	98.101	98.901	99.201	99.501	99.201	97.901	98.401	99.201	98.701	99.201	98.701	99.201	98.701	98.701	99.201	98.401	98.401	99.701	98.101	96.501	97.101	96.501	98.401	98.701	98.101	99.501	100.001
>RC336	98.901	98.901	97.601	98.401	98.901	97.901	97.301	98.701	98.901	99.201	99.501	97.601	97.601	98.401	98.401	98.401	98.101	98.901	98.401	98.401	98.901	97.601	98.101	98.901	97.301	96.501	97.301	96.301	98.101	98.901	98.401	98.401	98.701	100.001
>RC338	100.001	100.001	98.701	98.901	99.501	98.901	98.401	99.201	99.501	99.701	99.501	98.101	98.701	99.501	98.901	99.501	98.901	99.501	98.901	98.901	99.501	98.701	98.701	100.001	98.401	96.801	97.301	96.801	98.701	98.901	98.401	99.501	99.701	98.901	100.001
>RC339	99.701	99.701	98.401	98.701	99.201	98.701	98.101	98.901	99.201	99.501	99.201	97.901	98.401	99.201	98.701	99.201	98.701	99.201	98.701	98.701	99.201	98.401	98.401	99.701	98.101	96.501	97.101	96.501	98.401	98.701	98.101	99.201	99.501	98.701	99.701	100.001
>RC346	98.901	98.901	97.601	97.901	98.401	97.901	97.301	98.101	98.401	98.701	98.401	97.101	97.601	98.401	97.901	98.901	97.901	98.401	97.901	98.401	98.401	97.601	97.601	98.901	97.301	95.701	96.501	95.701	97.601	97.901	97.301	98.401	98.701	98.401	98.901	98.701	100.001
>RC352	99.701	99.701	98.401	98.701	99.201	98.701	98.101	98.901	99.201	99.501	99.201	97.901	98.401	99.201	98.701	99.201	98.701	99.201	98.701	98.701	99.201	98.401	98.401	99.701	98.101	96.501	97.101	96.501	98.401	98.701	98.101	99.201	99.501	98.701	99.701	100.001	98.701	100.001
>RC408	99.501	99.501	98.701	98.401	98.901	98.401	97.901	98.701	98.901	99.201	98.901	97.601	98.101	98.901	98.401	98.901	98.401	98.901	98.401	98.401	98.901	98.101	98.101	99.501	97.901	96.301	96.801	96.301	98.101	98.401	97.801	99.201	99.701	98.401	99.501	99.201	98.401	99.201	100.001
>RC445	98.901	98.901	97.601	98.401	98.901	98.101	97.301	98.101	98.901	99.201	99.501	97.601	97.601	98.701	98.401	98.901	98.101	98.901	98.401	97.901	98.901	97.601	98.701	98.901	97.301	96.801	97.101	96.301	98.101	98.901	98.401	98.401	98.701	98.901	98.901	98.701	98.401	98.701	98.401	100.001
>RC446	98.401	98.401	97.101	97.901	97.901	97.301	97.301	98.101	97.901	98.101	97.901	97.101	97.601	97.901	97.601	97.901	97.301	97.901	97.901	97.901	97.901	97.101	97.101	98.401	98.101	96.001	96.501	96.801	97.601	97.301	97.301	97.901	98.101	97.301	98.401	98.101	97.301	98.101	97.901	97.301	100.001
>RC473	99.701	99.701	98.401	99.201	99.201	98.701	98.101	99.501	99.201	99.501	99.201	97.901	98.401	99.201	98.701	99.201	98.701	99.201	98.701	98.701	99.201	98.401	98.401	99.701	98.701	96.501	97.101	96.801	98.401	98.701	98.101	99.201	99.501	98.701	99.701	99.501	98.701	99.501	99.201	98.701	98.701	100.001
>RC511	98.701	98.701	97.301	98.101	98.101	98.101	97.101	98.401	98.701	98.401	98.101	96.801	97.301	98.101	97.601	98.101	97.601	98.101	97.601	97.601	98.101	97.601	97.301	98.701	97.601	95.701	96.301	95.701	97.301	97.601	97.001	98.101	98.401	97.601	98.701	98.401	97.601	98.401	98.101	97.601	97.601	98.901	100.001
>RC545	99.701	99.701	98.401	98.701	99.201	98.701	98.101	98.901	99.201	99.501	99.201	97.901	98.401	99.201	98.701	99.201	98.701	99.201	98.701	98.701	99.201	98.401	98.401	99.701	98.101	96.501	97.101	96.501	98.401	98.701	98.101	99.201	99.501	98.701	99.701	99.501	98.701	99.501	99.201	98.701	98.101	99.501	98.401	100.001
>RC561	99.501	99.501	98.101	98.901	99.501	98.401	97.901	99.201	99.501	99.701	99.501	97.601	98.101	98.901	98.401	98.901	98.701	98.901	98.901	98.401	98.901	98.101	98.101	99.501	98.401	96.501	97.101	97.101	98.101	98.901	98.401	98.901	99.201	98.901	99.501	99.201	98.401	99.201	98.901	98.901	98.401	99.701	98.701	99.201	100.001
>RC595	98.701	98.701	98.401	97.601	98.101	97.601	98.701	97.901	98.101	98.401	98.101	97.901	97.901	98.101	97.901	98.101	97.601	98.101	98.701	97.601	98.101	97.901	97.301	98.701	97.101	96.001	96.001	95.501	97.301	97.601	97.001	98.701	98.401	97.601	98.701	98.401	97.601	98.401	98.101	97.601	97.601	98.401	97.301	98.401	98.101	100.001
>RC610	99.201	99.201	97.901	98.101	98.701	98.701	97.601	98.401	98.701	98.901	98.701	97.301	98.401	99.201	98.101	98.701	98.101	98.701	98.701	98.101	98.701	97.901	98.101	99.201	97.601	96.801	96.501	96.001	97.901	98.101	98.101	98.701	98.901	98.101	99.201	98.901	98.101	98.901	98.701	98.401	98.101	98.901	97.901	98.901	98.701	98.401	100.001
>RC632	99.701	99.701	98.401	98.701	99.201	98.701	98.101	98.901	99.201	99.501	99.201	97.901	98.401	99.201	98.701	99.201	98.701	99.201	98.701	98.701	99.201	98.401	98.401	99.701	98.101	96.501	97.601	96.501	98.401	98.701	98.101	99.201	99.501	98.701	99.701	99.501	98.701	99.501	99.201	98.701	98.101	99.501	98.401	99.501	99.201	98.401	98.901	100.001
>RC639	99.501	99.501	98.101	98.901	98.901	98.401	97.901	99.201	98.901	99.201	98.901	97.601	98.101	98.901	98.401	98.901	98.401	98.901	98.401	98.401	98.901	98.101	98.101	99.501	98.401	96.301	96.801	96.501	98.101	98.401	97.801	98.901	99.201	98.401	99.501	99.201	98.401	99.201	98.901	98.401	98.401	99.701	98.701	99.201	99.501	98.101	98.701	99.201	100.001
>RC648	98.701	98.701	98.401	97.601	98.701	97.601	98.101	97.901	98.701	98.901	98.701	97.301	97.301	98.101	97.601	98.101	97.901	98.101	98.101	97.601	98.101	97.301	97.301	98.701	97.101	95.701	96.301	96.001	97.301	98.101	97.601	98.101	98.401	98.101	98.701	98.401	97.601	98.401	98.101	98.101	97.101	98.401	97.301	98.401	98.701	98.401	97.901	98.401	98.101
>RC728	97.901	97.901	97.101	97.301	97.901	96.801	96.801	97.601	97.901	98.101	97.901	96.501	96.501	97.601	96.801	97.301	97.601	97.301	97.301	97.101	97.301	97.101	97.101	97.901	96.801	94.901	95.501	95.501	97.101	97.601	97.001	97.301	97.601	97.301	97.901	97.601	97.301	97.601	97.301	97.301	96.801	98.101	97.101	97.601	98.401	97.101	97.101	97.601	97.901
>RC750	99.701	99.701	98.401	98.701	99.201	99.201	98.101	98.901	99.201	99.501	99.201	97.901	98.401	99.701	98.701	99.201	98.701	99.201	98.701	98.701	99.201	98.401	98.701	99.701	98.101	97.101	97.101	96.501	98.401	98.701	98.101	99.201	99.501	98.701	99.701	99.501	98.701	99.501	99.201	98.901	98.101	99.501	98.401	99.501	99.201	98.401	99.501	99.501	99.201
>RC775	99.501	99.501	98.101	98.901	98.901	98.401	97.901	98.701	98.901	99.201	99.501	98.101	98.101	98.901	98.901	98.901	98.401	99.501	98.401	98.401	99.501	98.101	98.701	99.501	97.901	96.801	97.301	96.301	98.701	98.901	98.401	98.901	99.201	98.901	99.501	99.201	98.401	99.201	98.901	98.901	97.901	99.201	98.101	99.201	98.901	98.101	98.701	99.201	98.901
>RC779	98.901	98.901	97.601	98.401	98.401	97.901	97.301	98.101	98.401	98.701	98.901	97.901	97.601	98.401	98.401	98.401	97.901	98.901	97.901	97.901	98.901	97.601	98.101	98.901	97.301	96.301	96.801	95.701	98.101	98.401	97.801	98.401	98.701	98.401	98.901	98.701	97.901	98.701	98.901	98.401	97.301	98.701	97.601	98.701	98.401	97.601	98.101	98.701	98.401
>RC806	99.201	99.201	97.901	98.701	98.701	98.101	97.601	98.401	98.701	98.901	99.201	98.101	97.901	98.701	98.701	98.701	98.101	99.201	98.101	98.101	99.201	97.901	98.401	99.201	97.601	96.501	97.101	96.001	98.401	98.701	98.101	98.701	98.901	98.701	99.201	98.901	98.101	98.901	98.701	98.701	97.601	98.901	97.901	98.901	98.701	97.901	98.401	98.901	98.701
>RC827	99.701	99.701	98.401	98.701	99.201	98.701	98.101	98.901	99.201	99.501	99.201	97.901	98.401	99.201	98.701	99.201	98.701	99.201	98.701	98.701	99.201	98.401	98.401	99.701	98.101	96.501	97.101	96.501	98.401	98.701	98.101	99.201	99.501	98.701	99.701	99.701	98.701	99.701	99.201	98.701	98.101	99.501	98.401	99.501	99.201	98.401	98.901	99.501	99.201
>RC845	100.001	100.001	98.701	98.901	99.501	98.901	98.401	99.201	99.501	99.701	99.501	98.101	98.701	99.501	98.901	99.501	98.901	99.501	98.901	98.901	99.501	98.701	98.701	100.001	98.401	96.801	97.301	96.801	98.701	98.901	98.401	99.501	99.701	98.901	100.001	99.701	98.901	99.701	99.501	98.901	98.401	99.701	98.701	99.701	99.501	98.701	99.201	99.701	99.501
>RC868	98.401	98.401	97.101	97.901	98.401	97.901	96.801	98.101	98.401	98.701	98.401	96.501	97.101	98.401	97.301	97.901	97.601	97.901	97.901	97.301	97.901	97.101	97.301	98.401	97.601	96.001	96.001	96.301	97.101	97.901	97.301	97.901	98.101	97.901	98.401	98.101	97.301	98.101	97.901	98.101	97.301	98.701	97.601	98.101	98.901	97.101	98.101	98.101	98.401
>RC869	98.401	98.401	97.101	97.901	98.401	97.901	96.801	98.101	98.401	98.701	98.401	96.501	97.101	98.401	97.301	97.901	97.601	97.901	97.901	97.301	97.901	97.101	97.301	98.401	97.601	96.001	96.001	96.301	97.101	97.901	97.301	97.901	98.101	97.901	98.401	98.101	97.301	98.101	97.901	98.101	97.301	98.701	97.601	98.101	98.901	97.101	98.101	98.101	98.401
>RC882	98.901	98.901	98.401	98.401	98.401	97.901	97.901	98.701	98.401	98.701	98.401	97.601	97.601	98.401	97.901	98.401	97.901	98.401	97.901	97.901	98.401	97.601	97.601	98.901	97.901	95.701	96.301	96.001	97.601	97.901	97.301	98.701	98.901	97.901	98.901	98.701	97.901	98.701	98.701	97.901	97.901	99.201	98.101	98.701	98.901	98.101	98.101	98.701	98.901
>RC904	99.501	99.501	98.101	98.401	98.901	98.401	97.901	98.701	98.901	99.201	98.901	97.601	98.101	98.901	98.701	98.901	98.401	98.901	98.401	98.401	98.901	98.101	98.101	99.501	98.401	96.801	97.301	96.801	98.701	98.401	97.801	98.901	99.201	98.401	99.501	99.201	98.401	99.201	98.901	98.401	98.401	99.201	98.701	99.201	98.901	98.101	98.701	99.201	98.901
>RC907	99.201	99.201	97.901	98.401	98.701	98.101	97.601	98.701	98.701	98.901	98.701	97.301	97.901	98.701	98.101	98.701	98.101	98.701	98.101	98.101	98.701	97.901	97.901	99.201	97.901	96.301	96.501	96.301	97.901	98.101	98.101	98.701	98.901	98.101	99.201	98.901	98.101	98.901	99.201	98.101	97.901	99.201	98.101	98.901	98.901	97.901	98.901	98.901	98.901
>RC908	100.001	100.001	98.701	98.901	99.501	98.901	98.401	99.201	99.501	99.701	99.501	98.101	98.701	99.501	98.901	99.501	98.901	99.501	98.901	98.901	99.501	98.701	98.701	100.001	98.401	96.801	97.301	96.801	98.701	98.901	98.401	99.501	99.701	98.901	100.001	99.701	98.901	99.701	99.501	98.901	98.401	99.701	98.701	99.701	99.501	98.701	99.201	99.701	99.501
>RC919	99.701	99.701	98.401	98.701	99.201	98.701	98.101	98.901	99.201	99.501	99.201	97.901	98.401	99.201	98.901	99.201	98.701	99.201	98.701	98.701	99.201	98.401	98.401	99.701	98.701	97.101	97.601	97.101	98.901	98.701	98.101	99.201	99.501	98.701	99.701	99.501	98.701	99.501	99.201	98.701	98.701	99.501	98.401	99.501	99.201	98.401	98.901	99.501	99.201
>RC927	98.901	98.901	98.101	97.901	98.401	97.901	97.901	98.101	98.401	98.701	98.401	97.601	97.601	98.401	97.901	98.401	97.901	98.401	97.901	97.901	98.401	97.601	97.601	98.901	97.301	95.701	96.301	95.701	97.601	97.901	97.301	98.401	98.701	97.901	98.901	98.701	97.901	98.701	98.901	97.901	97.301	98.701	97.601	98.701	98.401	98.101	98.101	98.701	98.401
>RC931	99.701	99.701	98.401	99.201	99.201	98.701	98.101	98.901	99.201	99.501	99.701	98.401	98.401	99.201	99.201	99.201	98.701	99.701	98.701	98.701	99.701	98.401	98.901	99.701	98.101	97.101	97.601	96.501	98.901	99.201	98.601	99.201	99.501	99.201	99.701	99.501	98.701	99.501	99.201	99.201	98.101	99.501	98.401	99.501	99.201	98.401	98.901	99.501	99.201
>RC935	98.901	98.901	98.701	97.901	98.901	97.901	97.901	98.701	98.401	98.701	98.401	98.101	98.101	98.401	97.901	98.401	97.901	98.401	97.901	97.901	98.401	98.101	97.601	98.901	97.301	96.301	96.801	96.301	98.101	97.901	97.301	98.401	98.701	97.901	98.901	98.701	97.901	98.701	98.401	97.901	97.301	98.701	97.601	98.901	98.401	98.101	98.101	98.701	98.401
>RC1003	98.901	98.901	98.401	97.901	98.901	97.901	97.601	98.701	98.401	98.701	98.401	97.901	98.101	98.401	98.401	98.401	97.901	98.401	98.101	97.901	98.401	98.401	97.601	98.901	97.301	96.501	96.801	96.301	98.101	97.901	97.301	98.901	98.901	97.901	98.901	98.701	97.901	98.701	98.701	97.901	97.301	98.701	97.601	98.701	98.401	97.901	98.101	98.701	98.401
>RC1249	99.501	99.501	99.201	98.401	98.901	98.401	98.901	98.701	98.901	99.201	98.901	98.101	98.101	98.901	98.401	98.901	98.401	98.901	98.401	98.401	98.901	98.101	98.101	99.501	97.901	96.301	96.801	96.301	98.101	98.401	97.801	98.901	99.201	98.401	99.501	99.201	98.401	99.201	98.901	98.401	97.901	99.201	98.101	99.201	98.901	99.201	98.701	99.201	98.901
>RC1252	99.201	99.201	97.901	98.701	98.701	98.401	97.901	98.901	98.701	98.901	98.701	97.301	98.101	98.701	98.101	98.701	98.401	98.701	98.101	98.101	98.701	98.101	97.901	99.201	98.101	96.001	96.501	96.301	98.401	98.101	97.601	98.701	98.901	98.101	99.201	98.901	98.101	98.901	98.701	98.101	98.101	99.501	98.401	98.901	99.201	97.901	98.401	98.901	99.201
>RC1254	99.501	99.501	98.101	98.901	98.901	98.401	97.901	98.701	98.901	99.201	99.501	98.101	98.101	98.901	98.901	98.901	98.401	99.501	98.401	98.401	99.501	98.101	98.701	99.501	97.901	96.801	97.301	96.301	98.701	98.901	98.401	98.901	99.201	98.901	99.501	99.201	98.401	99.201	98.901	98.901	97.901	99.201	98.101	99.201	98.901	98.101	98.701	99.201	98.901
>RC1272	98.901	98.901	97.601	98.401	98.701	97.901	97.301	98.101	98.701	98.901	99.201	97.601	97.601	98.401	98.401	98.401	98.101	98.901	98.101	98.401	98.901	97.601	98.101	98.901	97.301	96.501	97.101	96.001	98.101	98.701	98.401	98.401	98.701	98.701	98.901	98.701	97.901	98.701	98.401	98.701	97.301	98.701	97.601	98.701	98.701	97.601	98.101	98.701	98.401
>RC1637	99.201	99.201	97.901	98.101	98.701	98.101	97.601	98.401	98.701	98.901	98.701	97.601	97.901	98.701	98.101	98.701	98.101	98.701	98.101	98.101	98.701	97.901	97.901	99.201	97.601	96.001	96.501	96.301	97.901	98.101	97.601	98.701	98.901	98.101	99.201	98.901	98.101	98.901	98.701	98.101	97.901	98.901	97.901	98.901	98.701	97.901	98.401	98.901	98.701
>RC1648	98.701	98.701	97.601	97.601	98.701	97.601	97.101	97.901	98.701	98.901	98.701	96.801	97.301	98.101	97.601	98.101	97.901	98.101	98.101	97.601	98.101	97.301	97.301	98.701	97.101	95.701	96.301	96.001	97.301	98.101	97.601	98.401	98.701	98.101	98.701	98.401	97.601	98.401	98.401	98.101	97.101	98.401	97.301	98.401	98.701	97.301	97.901	98.401	98.101
>RC1661	99.701	99.701	98.401	99.201	99.201	98.701	98.101	99.501	99.201	99.501	99.201	97.901	98.401	99.201	98.701	99.201	98.701	99.201	98.701	98.701	99.201	98.401	98.401	99.701	98.701	96.501	97.101	96.801	98.401	98.701	98.101	99.201	99.501	98.701	99.701	99.501	98.701	99.501	99.201	98.701	98.701	100.001	98.901	99.501	99.701	98.401	98.901	99.501	99.701
>RC1681	99.201	99.201	97.901	98.101	98.701	98.101	98.101	98.401	98.701	98.901	98.701	97.301	98.401	98.701	98.101	98.701	98.101	98.701	98.701	98.701	98.701	97.901	97.901	99.201	97.601	96.001	96.501	96.001	97.901	98.101	98.101	98.701	98.901	98.101	99.201	98.901	98.101	98.901	98.701	98.101	98.701	98.901	97.901	98.901	98.701	98.401	98.901	98.901	98.701
>KR1909	99.201	99.201	97.901	98.101	98.701	98.101	97.601	98.401	98.701	98.901	98.701	97.301	97.901	98.701	98.101	98.701	98.101	98.701	98.101	98.101	98.701	97.901	97.901	99.201	97.601	96.001	96.501	96.001	97.901	98.101	97.601	98.701	98.901	98.101	99.201	98.901	98.101	98.901	98.701	98.101	97.601	98.901	98.101	99.501	98.701	98.101	98.401	98.901	98.701
>KR1912	98.901	98.901	97.601	98.401	98.401	97.901	97.901	98.701	98.401	98.701	98.401	97.101	97.601	98.401	97.901	98.401	97.901	98.401	97.901	98.401	98.401	97.601	97.601	98.901	98.401	96.301	96.801	96.501	97.601	97.901	97.801	98.401	98.701	97.901	98.901	98.701	97.901	98.701	98.401	97.901	98.701	99.201	98.101	98.701	98.901	97.901	98.101	98.701	98.901
>KR1921	99.201	99.201	97.901	98.701	99.201	98.101	97.601	98.901	99.201	99.501	99.201	97.301	97.901	98.701	98.101	98.701	98.401	98.701	98.701	98.101	98.701	97.901	97.901	99.201	98.101	96.301	96.801	96.801	97.901	98.701	98.101	98.701	98.901	98.701	99.201	98.901	98.101	98.901	98.701	98.701	98.101	99.501	98.401	98.901	99.701	97.901	98.401	98.901	99.201
>ST1852	99.201	99.201	97.901	98.701	99.201	98.101	97.601	98.401	99.201	99.501	99.701	97.901	97.901	98.701	98.701	98.701	98.401	99.201	98.701	98.101	99.201	97.901	98.401	99.201	97.601	96.801	97.301	96.501	98.401	99.201	98.601	98.701	98.901	99.201	99.201	98.901	98.101	98.901	98.701	99.201	97.601	98.901	97.901	98.901	99.201	97.901	98.401	98.901	98.701
>ST1859	99.701	99.701	98.901	98.701	99.201	98.701	98.701	98.901	99.201	99.501	99.201	98.401	98.401	99.201	98.701	99.201	98.701	99.201	98.701	98.701	99.201	98.401	98.401	99.701	98.101	96.501	97.101	96.501	98.401	98.701	98.101	99.201	99.501	98.701	99.701	99.501	98.701	99.501	99.201	98.701	98.101	99.501	98.401	99.501	99.201	98.901	98.901	99.501	99.201
>KR21	98.401	98.401	97.601	97.601	97.901	97.901	97.101	97.601	97.901	98.101	98.101	96.801	97.601	97.901	97.601	97.901	97.301	98.101	97.301	97.301	98.101	97.301	97.301	98.401	96.801	95.501	96.001	95.201	97.301	97.601	97.001	97.901	98.101	97.601	98.401	98.101	97.301	98.101	97.901	97.601	96.801	98.101	97.101	98.701	97.901	97.101	97.601	98.101	97.901
>KR40	99.701	99.701	98.401	99.201	99.201	98.701	98.101	98.901	99.201	99.501	99.701	98.401	98.401	99.201	99.201	99.201	98.701	99.701	98.701	98.701	99.701	98.401	98.901	99.701	98.101	97.101	97.601	96.501	98.901	99.201	98.601	99.201	99.501	99.201	99.701	99.501	98.701	99.501	99.201	99.201	98.101	99.501	98.401	99.501	99.201	98.401	98.901	99.501	99.201
>KR103	98.901	98.901	98.101	98.401	99.501	97.901	97.901	99.201	98.901	99.201	98.901	98.101	98.101	98.401	98.101	98.401	98.101	98.401	98.901	97.901	98.401	98.701	97.601	98.901	97.901	97.101	97.101	97.101	98.101	98.401	97.801	98.901	98.701	98.401	98.901	98.701	97.901	98.701	98.401	98.401	97.901	99.201	98.101	98.701	99.501	98.101	98.101	98.701	98.901
>KR130	97.901	97.901	97.101	97.301	98.101	96.801	96.301	97.601	97.601	97.901	98.101	97.101	97.101	97.301	97.901	97.301	97.901	98.101	97.101	96.801	97.901	97.301	97.601	97.901	97.901	97.901	98.401	97.101	98.701	97.901	97.001	97.301	97.601	97.601	97.901	97.601	96.801	97.601	97.301	97.601	97.101	97.601	96.501	97.601	97.601	96.501	97.101	97.601	97.301
>KR145	98.901	98.901	97.601	98.901	98.401	98.101	97.301	98.101	98.401	98.701	98.901	97.601	97.601	98.701	98.401	98.401	98.401	98.901	97.901	97.901	98.901	97.601	98.701	98.901	97.301	97.101	96.801	95.701	98.101	98.401	97.801	98.401	98.701	98.401	98.901	98.701	97.901	98.701	98.401	98.901	97.301	98.701	97.601	98.701	98.401	97.601	98.401	98.701	98.401
>KR203	99.201	99.201	97.901	98.101	98.701	98.101	98.101	98.401	98.701	98.901	98.701	97.901	97.901	98.701	98.401	98.701	98.101	98.701	98.701	98.101	98.701	98.401	97.901	99.201	97.601	96.501	96.501	96.001	97.901	98.101	97.601	99.201	98.901	98.101	99.201	98.901	98.101	98.901	98.701	98.101	97.601	98.901	97.901	99.501	98.701	98.401	98.401	98.901	98.701
>KR236	98.701	98.701	97.301	98.101	98.701	97.601	97.101	97.901	98.701	98.901	99.201	97.301	97.301	98.101	98.101	98.101	97.901	98.701	98.101	97.601	98.701	97.301	97.901	98.701	97.101	96.301	96.801	96.001	97.901	98.701	98.401	98.101	98.401	98.701	98.701	98.401	97.601	98.401	98.101	98.701	97.101	98.401	97.301	98.401	98.701	97.301	97.901	98.401	98.101
>KR238	99.701	99.701	98.401	99.201	99.201	98.701	98.101	98.901	99.201	99.501	99.201	97.901	98.401	99.201	98.701	99.201	99.201	99.201	98.701	98.701	99.201	98.401	98.401	99.701	98.101	97.101	97.101	96.501	98.401	98.701	98.101	99.201	99.501	98.701	99.701	99.501	98.701	99.501	99.201	98.701	98.101	99.501	98.401	99.501	99.201	98.401	98.901	99.501	99.201
>KR267	98.101	98.101	96.801	97.601	97.601	97.101	96.501	97.901	97.601	97.901	97.601	96.301	96.801	97.601	97.301	97.901	97.101	97.901	97.101	97.101	97.601	96.801	96.801	98.101	98.701	96.301	96.801	97.301	97.601	97.101	96.501	97.601	97.901	97.101	98.101	97.901	97.301	97.901	97.601	97.301	97.901	98.401	97.301	97.901	98.101	96.801	97.301	97.901	98.101
>KR281	97.901	97.901	97.101	97.301	98.101	96.801	96.301	97.601	97.601	97.901	98.101	97.101	97.101	97.301	97.601	97.301	97.301	98.101	97.101	97.301	97.901	97.101	97.101	97.901	97.301	97.301	98.401	96.501	98.401	97.601	97.301	97.301	97.601	97.901	97.901	97.601	97.101	97.601	97.301	97.601	97.101	97.601	96.501	97.601	97.601	96.501	97.101	97.601	97.301
>KR285	97.801	97.801	96.501	97.001	97.301	96.701	96.201	97.301	97.301	97.601	97.301	95.901	96.701	97.301	97.001	97.301	96.701	97.601	96.701	97.001	97.301	96.501	96.501	97.801	98.101	95.901	96.701	97.001	97.601	96.701	96.201	97.301	97.601	96.701	97.801	97.601	96.701	97.601	97.301	96.701	97.301	97.801	96.701	98.101	97.601	96.501	97.001	97.601	97.601
>KR293	99.201	99.201	97.901	98.701	98.701	98.101	97.601	98.901	98.701	98.901	98.701	97.301	97.901	98.701	98.101	98.701	98.101	98.701	98.101	98.101	98.901	97.901	97.901	99.201	98.401	96.301	96.801	96.501	97.901	98.101	97.801	98.701	98.901	98.101	99.201	98.901	98.101	98.901	98.701	98.101	98.401	99.501	98.401	98.901	99.201	97.901	98.401	98.901	99.201
>KR316	100.001	100.001	98.701	98.901	99.501	98.901	98.401	99.201	99.501	99.701	99.501	98.101	98.701	99.501	98.901	99.501	98.901	99.501	98.901	98.901	99.501	98.701	98.701	100.001	98.401	96.801	97.301	96.801	98.701	98.901	98.401	99.501	99.701	98.901	100.001	99.701	98.901	99.701	99.501	98.901	98.401	99.701	98.701	99.701	99.501	98.701	99.201	99.701	99.501
>KR337	99.201	99.201	97.901	98.101	98.701	98.401	97.601	98.401	98.701	98.901	98.701	97.301	97.901	98.901	98.101	98.701	98.401	98.701	98.101	98.101	98.701	98.101	98.401	99.201	97.601	96.301	96.501	96.001	97.901	98.401	97.601	98.701	98.901	98.101	99.201	98.901	98.101	98.901	98.701	98.401	97.601	98.901	97.901	98.901	98.701	97.901	98.701	98.901	98.701
>KR360	99.501	99.501	98.701	98.901	98.901	98.401	97.901	98.701	98.901	99.201	99.501	98.101	98.101	98.901	98.901	98.901	98.401	99.501	98.401	98.401	99.501	98.101	98.701	99.501	97.901	96.801	97.301	96.301	98.701	98.901	98.401	99.201	99.701	98.901	99.501	99.201	98.401	99.201	99.501	98.901	97.901	99.201	98.101	99.201	98.901	98.101	98.701	99.201	98.901
>KR383	98.701	98.701	97.301	97.601	98.401	97.901	97.601	97.901	98.701	98.701	98.401	96.801	97.301	98.101	97.901	98.101	98.101	98.101	97.901	98.101	98.101	97.601	97.301	98.701	97.601	96.801	97.301	96.301	97.901	97.901	97.801	98.101	98.401	97.901	98.701	98.401	97.601	98.401	98.101	97.901	98.101	98.401	97.601	98.401	98.401	97.301	97.901	98.401	98.101
>KR408	97.601	97.601	96.701	97.601	97.001	96.501	96.501	96.701	97.001	97.301	97.601	96.701	96.501	97.001	97.601	97.001	96.501	97.801	96.501	97.001	98.101	96.201	97.001	97.601	97.601	95.901	97.001	95.901	97.801	97.001	96.701	97.001	97.301	97.301	97.601	97.301	96.701	97.301	97.001	97.001	96.501	97.301	96.201	97.301	97.001	96.701	96.701	97.301	97.001
>KR416	99.501	99.501	98.101	98.901	99.501	98.401	97.901	98.701	99.501	99.701	100.001	98.101	98.101	98.901	98.901	98.901	98.701	99.501	98.901	98.401	99.501	98.101	98.701	99.501	97.901	97.101	97.601	96.801	98.701	99.501	98.901	98.901	99.201	99.501	99.501	99.201	98.401	99.201	98.901	99.501	97.901	99.201	98.101	99.201	99.501	98.101	98.701	99.201	98.901
>KR487	99.201	99.201	97.901	98.701	99.201	98.101	97.901	98.401	99.201	99.501	99.701	98.101	97.901	98.701	99.201	98.701	98.401	99.201	98.901	98.101	99.201	98.101	98.401	99.201	97.601	97.101	97.301	96.501	98.401	99.201	98.601	98.901	98.901	99.201	99.201	98.901	98.101	98.901	98.701	99.201	97.601	98.901	97.901	98.901	99.201	98.101	98.401	98.901	98.701
>KR493	100.001	100.001	98.701	98.901	99.501	98.901	98.401	99.201	99.501	99.701	99.501	98.101	98.701	99.501	98.901	99.501	98.901	99.501	98.901	98.901	99.501	98.701	98.701	100.001	98.401	96.801	97.301	96.801	98.701	98.901	98.401	99.501	99.701	98.901	100.001	99.701	98.901	99.701	99.501	98.901	98.401	99.701	98.701	99.701	99.501	98.701	99.201	99.701	99.501
>KR504	99.701	99.701	98.401	99.201	99.201	98.701	98.101	99.501	99.201	99.501	99.201	97.901	98.401	99.201	98.701	99.201	98.701	99.201	98.701	98.701	99.201	98.401	98.401	99.701	98.701	96.501	97.101	96.801	98.401	98.701	98.101	99.201	99.501	98.701	99.701	99.501	98.701	99.501	99.201	98.701	98.701	100.001	98.901	99.501	99.701	98.401	98.901	99.501	99.701
>KR563	99.201	99.201	97.901	98.701	98.701	98.101	97.601	98.901	98.701	98.901	98.701	97.301	97.901	98.701	98.101	98.701	98.101	98.701	98.101	98.101	98.701	97.901	97.901	99.201	98.101	96.001	96.501	96.301	97.901	98.101	97.601	98.701	98.901	98.101	99.201	98.901	98.101	98.901	98.701	98.101	98.101	99.501	98.401	98.901	99.201	97.901	98.401	98.901	99.201
>KR573	98.901	98.901	97.901	98.101	98.701	97.901	97.301	98.701	98.401	98.701	98.401	97.301	97.901	98.401	97.901	98.701	97.901	98.401	97.901	97.901	98.401	97.901	97.601	98.901	97.601	96.001	96.501	96.301	97.901	97.901	97.301	98.401	98.701	97.901	98.901	98.701	98.101	98.701	98.401	98.101	97.601	98.901	97.901	98.701	98.701	97.601	98.101	98.701	98.701
>KR579	99.701	99.701	98.401	98.701	99.201	98.701	98.101	98.901	99.201	99.501	99.201	97.901	98.401	99.201	98.701	99.201	98.701	99.201	98.701	98.701	99.201	98.401	98.401	99.701	98.101	96.501	97.101	96.501	98.401	98.701	98.101	99.201	99.501	98.701	99.701	99.501	98.701	99.501	99.201	98.701	98.101	99.501	98.401	99.501	99.201	98.401	98.901	99.501	99.201
>KR588	98.701	98.701	97.301	98.101	98.701	97.601	97.101	98.401	98.701	98.901	98.701	97.301	97.301	98.101	97.601	98.101	97.901	98.101	98.101	97.901	98.101	97.301	97.301	98.701	97.601	95.701	96.801	96.801	97.301	98.101	97.601	98.101	98.401	98.401	98.701	98.401	97.901	98.401	98.101	98.101	98.101	98.901	97.901	98.401	99.201	97.301	97.901	98.401	98.701
>KR593	99.501	99.501	98.101	98.901	98.901	98.701	97.901	98.701	98.901	99.201	99.501	98.101	98.101	99.201	98.901	98.901	98.401	99.501	98.401	98.401	99.501	98.101	99.201	99.501	97.901	97.101	97.301	96.301	98.701	98.901	98.401	98.901	99.201	98.901	99.501	99.201	98.401	99.201	98.901	99.501	97.901	99.201	98.101	99.201	98.901	98.101	98.901	99.201	98.901
>KR602	99.201	99.201	97.901	98.401	98.701	98.101	97.901	98.401	98.701	98.901	98.701	97.601	97.901	98.701	98.701	98.701	98.401	98.701	98.401	98.101	98.701	98.101	97.901	99.201	97.601	96.501	96.501	96.001	97.901	98.101	97.601	98.901	98.901	98.101	99.201	98.901	98.101	98.901	98.701	98.101	97.601	98.901	98.101	98.901	98.701	98.101	98.401	98.901	98.701
>KR605	99.501	99.501	98.101	98.401	98.901	98.401	98.401	98.701	98.901	99.201	98.901	98.101	98.101	98.901	98.701	98.901	98.401	98.901	98.901	98.401	98.901	98.701	98.101	99.501	97.901	96.801	96.801	96.301	98.101	98.401	97.801	99.501	99.201	98.401	99.501	99.201	98.401	99.201	98.901	98.401	97.901	99.201	98.101	99.201	98.901	98.701	98.701	99.201	98.901
>KR620	99.701	99.701	98.401	98.701	99.201	98.701	98.101	98.901	99.201	99.501	99.201	97.901	98.401	99.201	98.701	99.201	98.701	99.201	98.701	98.701	99.201	98.401	98.401	99.701	98.101	96.501	97.101	96.501	98.401	98.701	98.101	99.201	99.501	98.701	99.701	99.501	98.701	99.501	99.701	98.701	98.101	99.501	98.401	99.501	99.201	98.401	98.901	99.501	99.201
>KR625	99.201	99.201	97.901	98.401	98.701	98.101	97.601	98.401	98.701	98.901	98.901	97.601	97.901	98.701	98.701	98.701	98.101	98.901	98.101	98.101	98.901	97.901	98.101	99.201	98.101	96.801	97.301	96.501	98.701	98.401	97.801	98.701	98.901	98.401	99.201	98.901	98.101	98.901	98.701	98.401	98.101	98.901	97.901	98.901	98.701	97.901	98.401	98.901	98.701
>KR634	99.201	99.201	97.901	98.101	99.201	98.701	97.601	98.401	99.201	99.501	99.201	97.301	97.901	99.201	98.101	98.701	98.401	98.701	98.701	98.401	98.701	97.901	98.101	99.201	97.601	96.801	96.801	96.501	97.901	98.701	98.101	98.701	98.901	98.701	99.201	98.901	98.101	98.901	98.701	98.901	97.601	98.901	97.901	98.901	99.201	97.901	98.901	98.901	98.701
>KR637	99.201	99.201	97.901	98.701	98.701	98.101	97.601	98.401	98.701	98.901	99.201	97.901	97.901	98.701	98.701	98.701	98.101	99.201	98.101	98.101	99.201	97.901	98.401	99.201	97.601	96.501	97.101	96.001	98.401	98.701	98.101	98.701	98.901	98.701	99.201	98.901	98.101	98.901	98.701	98.701	97.601	98.901	98.101	98.901	98.701	97.901	98.401	98.901	98.701
>KR1495	97.901	97.901	96.501	97.301	97.301	96.801	96.301	97.601	97.301	97.601	97.301	96.001	96.501	97.301	97.301	97.301	96.801	97.601	96.801	97.101	97.301	96.501	96.501	97.901	98.101	95.701	96.501	96.801	97.101	96.801	96.201	97.301	97.601	97.101	97.901	97.601	97.101	97.601	97.301	96.801	97.301	98.101	97.101	97.601	97.901	96.501	97.101	97.601	97.901
>384lib	99.701	99.701	98.401	99.201	99.201	98.701	98.101	98.901	99.201	99.501	99.701	98.401	98.401	99.201	99.201	99.201	98.701	99.701	98.701	98.701	99.701	98.401	98.901	99.701	98.101	97.101	97.601	96.501	98.901	99.201	98.601	99.201	99.501	99.201	99.701	99.501	98.701	99.501	99.201	99.201	98.101	99.501	98.401	99.501	99.201	98.401	98.901	99.501	99.201
>393lib	99.501	99.501	98.101	99.201	98.901	98.401	97.901	98.901	98.901	99.201	99.501	98.101	98.101	98.901	98.901	98.901	98.401	99.501	98.401	98.401	99.501	98.101	98.701	99.501	98.101	96.801	97.301	96.501	98.701	98.901	98.401	98.901	99.201	98.901	99.501	99.201	98.401	99.201	98.901	98.901	98.101	99.501	98.401	99.201	99.201	98.101	98.701	99.201	99.201
>409lib	98.101	98.101	98.401	98.101	98.101	97.101	97.601	97.901	97.601	97.901	98.101	97.901	97.301	97.601	97.901	97.601	97.101	98.101	97.101	97.101	98.701	97.301	97.301	98.101	96.801	96.301	96.801	95.701	98.101	97.601	97.301	97.601	97.901	97.601	98.101	97.901	97.101	97.901	97.601	97.601	96.801	97.901	96.801	97.901	97.601	97.901	97.301	97.901	97.601
>508lib	99.201	99.201	98.101	98.701	98.701	98.101	97.601	98.401	98.701	98.901	99.201	97.901	97.901	98.701	98.701	98.701	98.101	99.201	98.101	98.101	99.201	97.901	98.401	99.201	97.601	96.501	97.101	96.001	98.401	98.701	98.101	98.901	99.201	98.701	99.201	98.901	98.101	98.901	98.901	98.701	97.601	98.901	97.901	98.901	98.701	97.901	98.401	98.901	98.701
>1524lib	98.901	98.901	97.601	98.401	98.401	97.901	97.901	98.101	98.401	98.701	98.901	98.101	97.601	98.401	98.701	98.401	97.901	98.901	98.401	97.901	98.901	98.101	98.101	98.901	97.301	96.801	96.801	95.701	98.101	98.401	98.401	98.901	98.701	98.401	98.901	98.701	97.901	98.701	98.401	98.401	97.301	98.701	97.601	98.701	98.401	98.101	98.101	98.701	98.401
	>RC48	>RC50	>RC104	>RC106	>RC110	>RC113	>RC119	>RC129	>RC149	>RC167	>RC183	>RC185	>RC218	>RC234	>RC240	>RC246	>RC249	>RC251	>RC253	>RC254	>RC257	>RC258	>RC265	>RC274	>RC281	>RC282	>RC287	>RC288	>RC290	>RC301	>RC309	>RC311	>RC326	>RC336	>RC338	>RC339	>RC346	>RC352	>RC408	>RC445	>RC446	>RC473	>RC511	>RC545	>RC561	>RC595	>RC610	>RC632	>RC639
[truncated: 72 more columns]

## Sheet: Table S7
Supplementary materials, Shvets and Vinogradova, 2022. Occurrence and Genetic Characterization of Grapevine Pinot Gris Virus in Russia
Supplementary Table S7. The pairwise identity matrix of coat proteins’ amino acid sequences among Russian isolates. Mean values of identity score are shown to the right of the matrix in the order of increasing. Divergent isolate and it identity score is shown blue colour
>RC48	100.001
>RC50	100.001	100.001
>RC104	99.001	99.001	100.001
>RC106	99.501	99.501	98.501	100.001
>RC110	100.001	100.001	99.001	99.501	100.001
>RC113	100.001	100.001	99.001	99.501	100.001	100.001
>RC119	97.401	97.401	98.501	96.901	97.401	97.401	100.001
>RC129	99.001	99.001	97.901	99.001	99.001	99.001	96.401	100.001
>RC149	100.001	100.001	99.001	99.501	100.001	100.001	97.401	99.001	100.001
>RC167	100.001	100.001	99.001	99.501	100.001	100.001	97.401	99.001	100.001	100.001
>RC183	100.001	100.001	99.001	99.501	100.001	100.001	97.401	99.001	100.001	100.001	100.001
>RC185	99.501	99.501	98.501	99.001	99.501	99.501	97.901	98.501	99.501	99.501	99.501	100.001
>RC218	99.501	99.501	98.501	99.001	99.501	99.501	96.901	98.501	99.501	99.501	99.501	99.001	100.001
>RC234	100.001	100.001	99.001	99.501	100.001	100.001	97.401	99.001	100.001	100.001	100.001	99.501	99.501	100.001
>RC240	99.001	99.001	97.901	98.501	99.001	99.001	96.901	97.901	99.001	99.001	99.001	99.001	98.501	99.001	100.001
>RC246	100.001	100.001	99.001	99.501	100.001	100.001	97.401	99.001	100.001	100.001	100.001	99.501	99.501	100.001	99.001	100.001
>RC249	100.001	100.001	99.001	99.501	100.001	100.001	97.401	99.001	100.001	100.001	100.001	99.501	99.501	100.001	99.001	100.001	100.001
>RC251	100.001	100.001	99.001	99.501	100.001	100.001	97.401	99.001	100.001	100.001	100.001	99.501	99.501	100.001	99.001	100.001	100.001	100.001
>RC253	99.501	99.501	98.501	99.001	99.501	99.501	97.901	98.501	99.501	99.501	99.501	100.001	99.001	99.501	99.001	99.501	99.501	99.501	100.001
>RC254	100.001	100.001	99.001	99.501	100.001	100.001	97.401	99.001	100.001	100.001	100.001	99.501	99.501	100.001	99.001	100.001	100.001	100.001	99.501	100.001
>RC257	99.501	99.501	98.501	99.001	99.501	99.501	96.901	98.501	99.501	99.501	99.501	99.001	99.001	99.501	98.501	99.501	99.501	99.501	99.001	99.501	100.001
>RC258	99.501	99.501	98.501	99.001	99.501	99.501	97.901	98.501	99.501	99.501	99.501	100.001	99.001	99.501	99.001	99.501	99.501	99.501	100.001	99.501	99.001	100.001
>RC265	100.001	100.001	99.001	99.501	100.001	100.001	97.401	99.001	100.001	100.001	100.001	99.501	99.501	100.001	99.001	100.001	100.001	100.001	99.501	100.001	99.501	99.501	100.001
>RC274	100.001	100.001	99.001	99.501	100.001	100.001	97.401	99.001	100.001	100.001	100.001	99.501	99.501	100.001	99.001	100.001	100.001	100.001	99.501	100.001	99.501	99.501	100.001	100.001
>RC281	99.501	99.501	98.501	99.001	99.501	99.501	96.901	98.501	99.501	99.501	99.501	99.001	99.001	99.501	98.501	99.501	99.501	99.501	99.001	99.501	99.001	99.001	99.501	99.501	100.001
>RC282	99.001	99.001	97.901	98.501	99.001	99.001	96.901	97.901	99.001	99.001	99.001	99.001	98.501	99.001	98.501	99.001	99.001	99.001	99.001	99.001	98.501	99.001	99.001	99.001	99.501	100.001
>RC287	99.501	99.501	98.501	99.001	99.501	99.501	96.901	98.501	99.501	99.501	99.501	99.001	99.001	99.501	98.501	99.501	99.501	99.501	99.001	99.501	99.001	99.001	99.501	99.501	100.001	99.501	100.001
>RC288	99.501	99.501	98.501	99.001	99.501	99.501	96.901	98.501	99.501	99.501	99.501	99.001	99.001	99.501	98.501	99.501	99.501	99.501	99.001	99.501	99.001	99.001	99.501	99.501	100.001	99.501	100.001	100.001
>RC290	99.001	99.001	97.901	99.501	99.001	99.001	96.401	98.501	99.001	99.001	99.001	98.501	98.501	99.001	97.901	99.001	99.001	99.001	98.501	99.001	98.501	98.501	99.001	99.001	99.501	99.001	99.501	99.501	100.001
>RC301	100.001	100.001	99.001	99.501	100.001	100.001	97.401	99.001	100.001	100.001	100.001	99.501	99.501	100.001	99.001	100.001	100.001	100.001	99.501	100.001	99.501	99.501	100.001	100.001	99.501	99.001	99.501	99.501	99.001	100.001
>RC309	100.001	100.001	99.001	99.501	100.001	100.001	97.401	99.001	100.001	100.001	100.001	99.501	99.501	100.001	99.001	100.001	100.001	100.001	99.501	100.001	99.501	99.501	100.001	100.001	99.501	99.001	99.501	99.501	99.001	100.001	100.001
>RC311	99.001	99.001	97.901	98.501	99.001	99.001	96.901	97.901	99.001	99.001	99.001	99.001	98.501	99.001	98.501	99.001	99.001	99.001	99.001	99.001	98.501	99.001	99.001	99.001	99.501	100.001	99.501	99.501	99.001	99.001	99.001	100.001
>RC326	100.001	100.001	99.001	99.501	100.001	100.001	97.401	99.001	100.001	100.001	100.001	99.501	99.501	100.001	99.001	100.001	100.001	100.001	99.501	100.001	99.501	99.501	100.001	100.001	99.501	99.001	99.501	99.501	99.001	100.001	100.001	99.001	100.001
>RC336	100.001	100.001	99.001	99.501	100.001	100.001	97.401	99.001	100.001	100.001	100.001	99.501	99.501	100.001	99.001	100.001	100.001	100.001	99.501	100.001	99.501	99.501	100.001	100.001	99.501	99.001	99.501	99.501	99.001	100.001	100.001	99.001	100.001	100.001
>RC338	100.001	100.001	99.001	99.501	100.001	100.001	97.401	99.001	100.001	100.001	100.001	99.501	99.501	100.001	99.001	100.001	100.001	100.001	99.501	100.001	99.501	99.501	100.001	100.001	99.501	99.001	99.501	99.501	99.001	100.001	100.001	99.001	100.001	100.001	100.001
>RC339	100.001	100.001	99.001	99.501	100.001	100.001	97.401	99.001	100.001	100.001	100.001	99.501	99.501	100.001	99.001	100.001	100.001	100.001	99.501	100.001	99.501	99.501	100.001	100.001	99.501	99.001	99.501	99.501	99.001	100.001	100.001	99.001	100.001	100.001	100.001	100.001
>RC346	100.001	100.001	99.001	99.501	100.001	100.001	97.401	99.001	100.001	100.001	100.001	99.501	99.501	100.001	99.001	100.001	100.001	100.001	99.501	100.001	99.501	99.501	100.001	100.001	99.501	99.001	99.501	99.501	99.001	100.001	100.001	99.001	100.001	100.001	100.001	100.001	100.001
>RC352	100.001	100.001	99.001	99.501	100.001	100.001	97.401	99.001	100.001	100.001	100.001	99.501	99.501	100.001	99.001	100.001	100.001	100.001	99.501	100.001	99.501	99.501	100.001	100.001	99.501	99.001	99.501	99.501	99.001	100.001	100.001	99.001	100.001	100.001	100.001	100.001	100.001	100.001
>RC408	100.001	100.001	99.001	99.501	100.001	100.001	97.401	99.001	100.001	100.001	100.001	99.501	99.501	100.001	99.001	100.001	100.001	100.001	99.501	100.001	99.501	99.501	100.001	100.001	99.501	99.001	99.501	99.501	99.001	100.001	100.001	99.001	100.001	100.001	100.001	100.001	100.001	100.001	100.001
>RC445	100.001	100.001	99.001	99.501	100.001	100.001	97.401	99.001	100.001	100.001	100.001	99.501	99.501	100.001	99.001	100.001	100.001	100.001	99.501	100.001	99.501	99.501	100.001	100.001	99.501	99.001	99.501	99.501	99.001	100.001	100.001	99.001	100.001	100.001	100.001	100.001	100.001	100.001	100.001	100.001
>RC446	100.001	100.001	99.001	99.501	100.001	100.001	97.401	99.001	100.001	100.001	100.001	99.501	99.501	100.001	99.001	100.001	100.001	100.001	99.501	100.001	99.501	99.501	100.001	100.001	99.501	99.001	99.501	99.501	99.001	100.001	100.001	99.001	100.001	100.001	100.001	100.001	100.001	100.001	100.001	100.001	100.001
>RC473	99.501	99.501	98.501	99.001	99.501	99.501	96.901	98.501	99.501	99.501	99.501	99.001	99.001	99.501	98.501	99.501	99.501	99.501	99.001	99.501	99.001	99.001	99.501	99.501	99.001	98.501	99.001	99.001	98.501	99.501	99.501	98.501	99.501	99.501	99.501	99.501	99.501	99.501	99.501	99.501	99.501	100.001
>RC511	100.001	100.001	99.001	99.501	100.001	100.001	97.401	99.001	100.001	100.001	100.001	99.501	99.501	100.001	99.001	100.001	100.001	100.001	99.501	100.001	99.501	99.501	100.001	100.001	99.501	99.001	99.501	99.501	99.001	100.001	100.001	99.001	100.001	100.001	100.001	100.001	100.001	100.001	100.001	100.001	100.001	99.501	100.001
>RC545	99.501	99.501	98.501	99.001	99.501	99.501	96.901	98.501	99.501	99.501	99.501	99.001	99.001	99.501	98.501	99.501	99.501	99.501	99.001	99.501	99.001	99.001	99.501	99.501	99.001	98.501	99.001	99.001	98.501	99.501	99.501	98.501	99.501	99.501	99.501	99.501	99.501	99.501	99.501	99.501	99.501	99.001	99.501	100.001
>RC561	100.001	100.001	99.001	99.501	100.001	100.001	97.401	99.001	100.001	100.001	100.001	99.501	99.501	100.001	99.001	100.001	100.001	100.001	99.501	100.001	99.501	99.501	100.001	100.001	99.501	99.001	99.501	99.501	99.001	100.001	100.001	99.001	100.001	100.001	100.001	100.001	100.001	100.001	100.001	100.001	100.001	99.501	100.001	99.501	100.001
>RC595	98.501	98.501	99.501	97.901	98.501	98.501	99.001	97.401	98.501	98.501	98.501	99.001	97.901	98.501	97.901	98.501	98.501	98.501	99.001	98.501	97.901	99.001	98.501	98.501	97.901	97.901	97.901	97.901	97.401	98.501	98.501	97.901	98.501	98.501	98.501	98.501	98.501	98.501	98.501	98.501	98.501	97.901	98.501	97.901	98.501	100.001
>RC610	99.501	99.501	98.501	99.001	99.501	99.501	96.901	98.501	99.501	99.501	99.501	99.001	99.001	99.501	98.501	99.501	99.501	99.501	99.001	99.501	99.001	99.001	99.501	99.501	99.001	98.501	99.001	99.001	98.501	99.501	99.501	98.501	99.501	99.501	99.501	99.501	99.501	99.501	99.501	99.501	99.501	99.001	99.501	99.001	99.501	97.901	100.001
>RC632	100.001	100.001	99.001	99.501	100.001	100.001	97.401	99.001	100.001	100.001	100.001	99.501	99.501	100.001	99.001	100.001	100.001	100.001	99.501	100.001	99.501	99.501	100.001	100.001	99.501	99.001	99.501	99.501	99.001	100.001	100.001	99.001	100.001	100.001	100.001	100.001	100.001	100.001	100.001	100.001	100.001	99.501	100.001	99.501	100.001	98.501	99.501	100.001
>RC639	100.001	100.001	99.001	99.501	100.001	100.001	97.401	99.001	100.001	100.001	100.001	99.501	99.501	100.001	99.001	100.001	100.001	100.001	99.501	100.001	99.501	99.501	100.001	100.001	99.501	99.001	99.501	99.501	99.001	100.001	100.001	99.001	100.001	100.001	100.001	100.001	100.001	100.001	100.001	100.001	100.001	99.501	100.001	99.501	100.001	98.501	99.501	100.001	100.001
>RC648	99.001	99.001	100.001	98.501	99.001	99.001	98.501	97.901	99.001	99.001	99.001	98.501	98.501	99.001	97.901	99.001	99.001	99.001	98.501	99.001	98.501	98.501	99.001	99.001	98.501	97.901	98.501	98.501	97.901	99.001	99.001	97.901	99.001	99.001	99.001	99.001	99.001	99.001	99.001	99.001	99.001	98.501	99.001	98.501	99.001	99.501	98.501	99.001	99.001
>RC728	100.001	100.001	99.001	99.501	100.001	100.001	97.401	99.001	100.001	100.001	100.001	99.501	99.501	100.001	99.001	100.001	100.001	100.001	99.501	100.001	99.501	99.501	100.001	100.001	99.501	99.001	99.501	99.501	99.001	100.001	100.001	99.001	100.001	100.001	100.001	100.001	100.001	100.001	100.001	100.001	100.001	99.501	100.001	99.501	100.001	98.501	99.501	100.001	100.001
>RC750	100.001	100.001	99.001	99.501	100.001	100.001	97.401	99.001	100.001	100.001	100.001	99.501	99.501	100.001	99.001	100.001	100.001	100.001	99.501	100.001	99.501	99.501	100.001	100.001	99.501	99.001	99.501	99.501	99.001	100.001	100.001	99.001	100.001	100.001	100.001	100.001	100.001	100.001	100.001	100.001	100.001	99.501	100.001	99.501	100.001	98.501	99.501	100.001	100.001
>RC775	99.501	99.501	98.501	99.501	99.501	99.501	96.901	99.001	99.501	99.501	99.501	99.001	99.001	99.501	98.501	99.501	99.501	99.501	99.001	99.501	99.001	99.001	99.501	99.501	99.001	98.501	99.001	99.001	99.001	99.501	99.501	98.501	99.501	99.501	99.501	99.501	99.501	99.501	99.501	99.501	99.501	99.001	99.501	99.001	99.501	97.901	99.001	99.501	99.501
>RC779	100.001	100.001	99.001	99.501	100.001	100.001	97.401	99.001	100.001	100.001	100.001	99.501	99.501	100.001	99.001	100.001	100.001	100.001	99.501	100.001	99.501	99.501	100.001	100.001	99.501	99.001	99.501	99.501	99.001	100.001	100.001	99.001	100.001	100.001	100.001	100.001	100.001	100.001	100.001	100.001	100.001	99.501	100.001	99.501	100.001	98.501	99.501	100.001	100.001
>RC806	100.001	100.001	99.001	99.501	100.001	100.001	97.401	99.001	100.001	100.001	100.001	99.501	99.501	100.001	99.001	100.001	100.001	100.001	99.501	100.001	99.501	99.501	100.001	100.001	99.501	99.001	99.501	99.501	99.001	100.001	100.001	99.001	100.001	100.001	100.001	100.001	100.001	100.001	100.001	100.001	100.001	99.501	100.001	99.501	100.001	98.501	99.501	100.001	100.001
>RC827	100.001	100.001	99.001	99.501	100.001	100.001	97.401	99.001	100.001	100.001	100.001	99.501	99.501	100.001	99.001	100.001	100.001	100.001	99.501	100.001	99.501	99.501	100.001	100.001	99.501	99.001	99.501	99.501	99.001	100.001	100.001	99.001	100.001	100.001	100.001	100.001	100.001	100.001	100.001	100.001	100.001	99.501	100.001	99.501	100.001	98.501	99.501	100.001	100.001
>RC845	100.001	100.001	99.001	99.501	100.001	100.001	97.401	99.001	100.001	100.001	100.001	99.501	99.501	100.001	99.001	100.001	100.001	100.001	99.501	100.001	99.501	99.501	100.001	100.001	99.501	99.001	99.501	99.501	99.001	100.001	100.001	99.001	100.001	100.001	100.001	100.001	100.001	100.001	100.001	100.001	100.001	99.501	100.001	99.501	100.001	98.501	99.501	100.001	100.001
>RC868	100.001	100.001	99.001	99.501	100.001	100.001	97.401	99.001	100.001	100.001	100.001	99.501	99.501	100.001	99.001	100.001	100.001	100.001	99.501	100.001	99.501	99.501	100.001	100.001	99.501	99.001	99.501	99.501	99.001	100.001	100.001	99.001	100.001	100.001	100.001	100.001	100.001	100.001	100.001	100.001	100.001	99.501	100.001	99.501	100.001	98.501	99.501	100.001	100.001
>RC869	100.001	100.001	99.001	99.501	100.001	100.001	97.401	99.001	100.001	100.001	100.001	99.501	99.501	100.001	99.001	100.001	100.001	100.001	99.501	100.001	99.501	99.501	100.001	100.001	99.501	99.001	99.501	99.501	99.001	100.001	100.001	99.001	100.001	100.001	100.001	100.001	100.001	100.001	100.001	100.001	100.001	99.501	100.001	99.501	100.001	98.501	99.501	100.001	100.001
>RC882	100.001	100.001	99.001	99.501	100.001	100.001	97.401	99.001	100.001	100.001	100.001	99.501	99.501	100.001	99.001	100.001	100.001	100.001	99.501	100.001	99.501	99.501	100.001	100.001	99.501	99.001	99.501	99.501	99.001	100.001	100.001	99.001	100.001	100.001	100.001	100.001	100.001	100.001	100.001	100.001	100.001	99.501	100.001	99.501	100.001	98.501	99.501	100.001	100.001
>RC904	100.001	100.001	99.001	99.501	100.001	100.001	97.401	99.001	100.001	100.001	100.001	99.501	99.501	100.001	99.001	100.001	100.001	100.001	99.501	100.001	99.501	99.501	100.001	100.001	99.501	99.001	99.501	99.501	99.001	100.001	100.001	99.001	100.001	100.001	100.001	100.001	100.001	100.001	100.001	100.001	100.001	99.501	100.001	99.501	100.001	98.501	99.501	100.001	100.001
>RC907	100.001	100.001	99.001	99.501	100.001	100.001	97.401	99.001	100.001	100.001	100.001	99.501	99.501	100.001	99.001	100.001	100.001	100.001	99.501	100.001	99.501	99.501	100.001	100.001	99.501	99.001	99.501	99.501	99.001	100.001	100.001	99.001	100.001	100.001	100.001	100.001	100.001	100.001	100.001	100.001	100.001	99.501	100.001	99.501	100.001	98.501	99.501	100.001	100.001
>RC908	100.001	100.001	99.001	99.501	100.001	100.001	97.401	99.001	100.001	100.001	100.001	99.501	99.501	100.001	99.001	100.001	100.001	100.001	99.501	100.001	99.501	99.501	100.001	100.001	99.501	99.001	99.501	99.501	99.001	100.001	100.001	99.001	100.001	100.001	100.001	100.001	100.001	100.001	100.001	100.001	100.001	99.501	100.001	99.501	100.001	98.501	99.501	100.001	100.001
>RC919	100.001	100.001	99.001	99.501	100.001	100.001	97.401	99.001	100.001	100.001	100.001	99.501	99.501	100.001	99.001	100.001	100.001	100.001	99.501	100.001	99.501	99.501	100.001	100.001	99.501	99.001	99.501	99.501	99.001	100.001	100.001	99.001	100.001	100.001	100.001	100.001	100.001	100.001	100.001	100.001	100.001	99.501	100.001	99.501	100.001	98.501	99.501	100.001	100.001
>RC927	100.001	100.001	99.001	99.501	100.001	100.001	97.401	99.001	100.001	100.001	100.001	99.501	99.501	100.001	99.001	100.001	100.001	100.001	99.501	100.001	99.501	99.501	100.001	100.001	99.501	99.001	99.501	99.501	99.001	100.001	100.001	99.001	100.001	100.001	100.001	100.001	100.001	100.001	100.001	100.001	100.001	99.501	100.001	99.501	100.001	98.501	99.501	100.001	100.001
>RC931	100.001	100.001	99.001	99.501	100.001	100.001	97.401	99.001	100.001	100.001	100.001	99.501	99.501	100.001	99.001	100.001	100.001	100.001	99.501	100.001	99.501	99.501	100.001	100.001	99.501	99.001	99.501	99.501	99.001	100.001	100.001	99.001	100.001	100.001	100.001	100.001	100.001	100.001	100.001	100.001	100.001	99.501	100.001	99.501	100.001	98.501	99.501	100.001	100.001
>RC935	100.001	100.001	99.001	99.501	100.001	100.001	97.401	99.001	100.001	100.001	100.001	99.501	99.501	100.001	99.001	100.001	100.001	100.001	99.501	100.001	99.501	99.501	100.001	100.001	99.501	99.001	99.501	99.501	99.001	100.001	100.001	99.001	100.001	100.001	100.001	100.001	100.001	100.001	100.001	100.001	100.001	99.501	100.001	99.501	100.001	98.501	99.501	100.001	100.001
>RC1003	99.501	99.501	98.501	99.001	99.501	99.501	97.401	98.501	99.501	99.501	99.501	99.501	99.001	99.501	99.501	99.501	99.501	99.501	99.501	99.501	99.001	99.501	99.501	99.501	99.001	99.001	99.001	99.001	98.501	99.501	99.501	99.001	99.501	99.501	99.501	99.501	99.501	99.501	99.501	99.501	99.501	99.001	99.501	99.001	99.501	98.501	99.001	99.501	99.501
>RC1249	99.001	99.001	100.001	98.501	99.001	99.001	98.501	97.901	99.001	99.001	99.001	98.501	98.501	99.001	97.901	99.001	99.001	99.001	98.501	99.001	98.501	98.501	99.001	99.001	98.501	97.901	98.501	98.501	97.901	99.001	99.001	97.901	99.001	99.001	99.001	99.001	99.001	99.001	99.001	99.001	99.001	98.501	99.001	98.501	99.001	99.501	98.501	99.001	99.001
>RC1252	100.001	100.001	99.001	99.501	100.001	100.001	97.401	99.001	100.001	100.001	100.001	99.501	99.501	100.001	99.001	100.001	100.001	100.001	99.501	100.001	99.501	99.501	100.001	100.001	99.501	99.001	99.501	99.501	99.001	100.001	100.001	99.001	100.001	100.001	100.001	100.001	100.001	100.001	100.001	100.001	100.001	99.501	100.001	99.501	100.001	98.501	99.501	100.001	100.001
>RC1254	100.001	100.001	99.001	99.501	100.001	100.001	97.401	99.001	100.001	100.001	100.001	99.501	99.501	100.001	99.001	100.001	100.001	100.001	99.501	100.001	99.501	99.501	100.001	100.001	99.501	99.001	99.501	99.501	99.001	100.001	100.001	99.001	100.001	100.001	100.001	100.001	100.001	100.001	100.001	100.001	100.001	99.501	100.001	99.501	100.001	98.501	99.501	100.001	100.001
>RC1272	99.501	99.501	98.501	99.001	99.501	99.501	96.901	98.501	99.501	99.501	99.501	99.001	99.001	99.501	98.501	99.501	99.501	99.501	99.001	99.501	99.001	99.001	99.501	99.501	99.001	98.501	99.001	99.001	98.501	99.501	99.501	98.501	99.501	99.501	99.501	99.501	99.501	99.501	99.501	99.501	99.501	99.001	99.501	99.001	99.501	97.901	99.001	99.501	99.501
>RC1637	100.001	100.001	99.001	99.501	100.001	100.001	97.401	99.001	100.001	100.001	100.001	99.501	99.501	100.001	99.001	100.001	100.001	100.001	99.501	100.001	99.501	99.501	100.001	100.001	99.501	99.001	99.501	99.501	99.001	100.001	100.001	99.001	100.001	100.001	100.001	100.001	100.001	100.001	100.001	100.001	100.001	99.501	100.001	99.501	100.001	98.501	99.501	100.001	100.001
>RC1648	100.001	100.001	99.001	99.501	100.001	100.001	97.401	99.001	100.001	100.001	100.001	99.501	99.501	100.001	99.001	100.001	100.001	100.001	99.501	100.001	99.501	99.501	100.001	100.001	99.501	99.001	99.501	99.501	99.001	100.001	100.001	99.001	100.001	100.001	100.001	100.001	100.001	100.001	100.001	100.001	100.001	99.501	100.001	99.501	100.001	98.501	99.501	100.001	100.001
>RC1661	99.501	99.501	98.501	99.001	99.501	99.501	96.901	98.501	99.501	99.501	99.501	99.001	99.001	99.501	98.501	99.501	99.501	99.501	99.001	99.501	99.001	99.001	99.501	99.501	99.001	98.501	99.001	99.001	98.501	99.501	99.501	98.501	99.501	99.501	99.501	99.501	99.501	99.501	99.501	99.501	99.501	99.001	99.501	99.001	99.501	97.901	99.001	99.501	99.501
>RC1681	100.001	100.001	99.001	99.501	100.001	100.001	97.401	99.001	100.001	100.001	100.001	99.501	99.501	100.001	99.001	100.001	100.001	100.001	99.501	100.001	99.501	99.501	100.001	100.001	99.501	99.001	99.501	99.501	99.001	100.001	100.001	99.001	100.001	100.001	100.001	100.001	100.001	100.001	100.001	100.001	100.001	99.501	100.001	99.501	100.001	98.501	99.501	100.001	100.001
>KR1909	100.001	100.001	99.001	99.501	100.001	100.001	97.401	99.001	100.001	100.001	100.001	99.501	99.501	100.001	99.001	100.001	100.001	100.001	99.501	100.001	99.501	99.501	100.001	100.001	99.501	99.001	99.501	99.501	99.001	100.001	100.001	99.001	100.001	100.001	100.001	100.001	100.001	100.001	100.001	100.001	100.001	99.501	100.001	99.501	100.001	98.501	99.501	100.001	100.001
>KR1912	100.001	100.001	99.001	99.501	100.001	100.001	97.401	99.001	100.001	100.001	100.001	99.501	99.501	100.001	99.001	100.001	100.001	100.001	99.501	100.001	99.501	99.501	100.001	100.001	99.501	99.001	99.501	99.501	99.001	100.001	100.001	99.001	100.001	100.001	100.001	100.001	100.001	100.001	100.001	100.001	100.001	99.501	100.001	99.501	100.001	98.501	99.501	100.001	100.001
>KR1921	100.001	100.001	99.001	99.501	100.001	100.001	97.401	99.001	100.001	100.001	100.001	99.501	99.501	100.001	99.001	100.001	100.001	100.001	99.501	100.001	99.501	99.501	100.001	100.001	99.501	99.001	99.501	99.501	99.001	100.001	100.001	99.001	100.001	100.001	100.001	100.001	100.001	100.001	100.001	100.001	100.001	99.501	100.001	99.501	100.001	98.501	99.501	100.001	100.001
>ST1852	100.001	100.001	99.001	99.501	100.001	100.001	97.401	99.001	100.001	100.001	100.001	99.501	99.501	100.001	99.001	100.001	100.001	100.001	99.501	100.001	99.501	99.501	100.001	100.001	99.501	99.001	99.501	99.501	99.001	100.001	100.001	99.001	100.001	100.001	100.001	100.001	100.001	100.001	100.001	100.001	100.001	99.501	100.001	99.501	100.001	98.501	99.501	100.001	100.001
>ST1859	100.001	100.001	99.001	99.501	100.001	100.001	97.401	99.001	100.001	100.001	100.001	99.501	99.501	100.001	99.001	100.001	100.001	100.001	99.501	100.001	99.501	99.501	100.001	100.001	99.501	99.001	99.501	99.501	99.001	100.001	100.001	99.001	100.001	100.001	100.001	100.001	100.001	100.001	100.001	100.001	100.001	99.501	100.001	99.501	100.001	98.501	99.501	100.001	100.001
>KR21	100.001	100.001	99.001	99.501	100.001	100.001	97.401	99.001	100.001	100.001	100.001	99.501	99.501	100.001	99.001	100.001	100.001	100.001	99.501	100.001	99.501	99.501	100.001	100.001	99.501	99.001	99.501	99.501	99.001	100.001	100.001	99.001	100.001	100.001	100.001	100.001	100.001	100.001	100.001	100.001	100.001	99.501	100.001	99.501	100.001	98.501	99.501	100.001	100.001
>KR40	99.501	99.501	98.501	99.001	99.501	99.501	96.901	98.501	99.501	99.501	99.501	99.001	99.001	99.501	98.501	99.501	99.501	99.501	99.001	99.501	99.001	99.001	99.501	99.501	99.001	98.501	99.001	99.001	98.501	99.501	99.501	98.501	99.501	99.501	99.501	99.501	99.501	99.501	99.501	99.501	99.501	99.001	99.501	99.001	99.501	97.901	99.001	99.501	99.501
>KR103	99.001	99.001	97.901	98.501	99.001	99.001	96.901	97.901	99.001	99.001	99.001	99.001	98.501	99.001	98.501	99.001	99.001	99.001	99.001	99.001	98.501	99.001	99.001	99.001	98.501	99.001	98.501	98.501	97.901	99.001	99.001	99.001	99.001	99.001	99.001	99.001	99.001	99.001	99.001	99.001	99.001	98.501	99.001	98.501	99.001	97.901	98.501	99.001	99.001
>KR130	99.501	99.501	98.501	99.001	99.501	99.501	96.901	98.501	99.501	99.501	99.501	99.001	99.001	99.501	98.501	99.501	99.501	99.501	99.001	99.501	99.001	99.001	99.501	99.501	100.001	99.501	100.001	100.001	99.501	99.501	99.501	99.501	99.501	99.501	99.501	99.501	99.501	99.501	99.501	99.501	99.501	99.001	99.501	99.001	99.501	97.901	99.001	99.501	99.501
>KR145	100.001	100.001	99.001	99.501	100.001	100.001	97.401	99.001	100.001	100.001	100.001	99.501	99.501	100.001	99.001	100.001	100.001	100.001	99.501	100.001	99.501	99.501	100.001	100.001	99.501	99.001	99.501	99.501	99.001	100.001	100.001	99.001	100.001	100.001	100.001	100.001	100.001	100.001	100.001	100.001	100.001	99.501	100.001	99.501	100.001	98.501	99.501	100.001	100.001
>KR203	99.001	99.001	97.901	98.501	99.001	99.001	97.901	97.901	99.001	99.001	99.001	99.001	98.501	99.001	98.501	99.001	99.001	99.001	99.001	99.001	98.501	99.001	99.001	99.001	98.501	99.001	98.501	98.501	97.901	99.001	99.001	99.001	99.001	99.001	99.001	99.001	99.001	99.001	99.001	99.001	99.001	98.501	99.001	98.501	99.001	97.901	98.501	99.001	99.001
>KR236	100.001	100.001	99.001	99.501	100.001	100.001	97.401	99.001	100.001	100.001	100.001	99.501	99.501	100.001	99.001	100.001	100.001	100.001	99.501	100.001	99.501	99.501	100.001	100.001	99.501	99.001	99.501	99.501	99.001	100.001	100.001	99.001	100.001	100.001	100.001	100.001	100.001	100.001	100.001	100.001	100.001	99.501	100.001	99.501	100.001	98.501	99.501	100.001	100.001
>KR238	100.001	100.001	99.001	99.501	100.001	100.001	97.401	99.001	100.001	100.001	100.001	99.501	99.501	100.001	99.001	100.001	100.001	100.001	99.501	100.001	99.501	99.501	100.001	100.001	99.501	99.001	99.501	99.501	99.001	100.001	100.001	99.001	100.001	100.001	100.001	100.001	100.001	100.001	100.001	100.001	100.001	99.501	100.001	99.501	100.001	98.501	99.501	100.001	100.001
>KR267	99.501	99.501	98.501	99.001	99.501	99.501	96.901	98.501	99.501	99.501	99.501	99.001	99.001	99.501	98.501	99.501	99.501	99.501	99.001	99.501	99.001	99.001	99.501	99.501	100.001	99.501	100.001	100.001	99.501	99.501	99.501	99.501	99.501	99.501	99.501	99.501	99.501	99.501	99.501	99.501	99.501	99.001	99.501	99.001	99.501	97.901	99.001	99.501	99.501
>KR281	99.501	99.501	98.501	99.001	99.501	99.501	96.901	98.501	99.501	99.501	99.501	99.001	99.001	99.501	98.501	99.501	99.501	99.501	99.001	99.501	99.001	99.001	99.501	99.501	100.001	99.501	100.001	100.001	99.501	99.501	99.501	99.501	99.501	99.501	99.501	99.501	99.501	99.501	99.501	99.501	99.501	99.001	99.501	99.001	99.501	97.901	99.001	99.501	99.501
>KR285	99.501	99.501	98.501	99.001	99.501	99.501	96.901	98.501	99.501	99.501	99.501	99.001	99.001	99.501	98.501	99.501	99.501	99.501	99.001	99.501	99.001	99.001	99.501	99.501	100.001	99.501	100.001	100.001	99.501	99.501	99.501	99.501	99.501	99.501	99.501	99.501	99.501	99.501	99.501	99.501	99.501	99.001	99.501	99.001	99.501	97.901	99.001	99.501	99.501
>KR293	99.501	99.501	98.501	99.001	99.501	99.501	96.901	98.501	99.501	99.501	99.501	99.001	99.001	99.501	98.501	99.501	99.501	99.501	99.001	99.501	99.001	99.001	99.501	99.501	99.001	98.501	99.001	99.001	98.501	99.501	99.501	98.501	99.501	99.501	99.501	99.501	99.501	99.501	99.501	99.501	99.501	99.001	99.501	99.001	99.501	97.901	99.001	99.501	99.501
>KR316	100.001	100.001	99.001	99.501	100.001	100.001	97.401	99.001	100.001	100.001	100.001	99.501	99.501	100.001	99.001	100.001	100.001	100.001	99.501	100.001	99.501	99.501	100.001	100.001	99.501	99.001	99.501	99.501	99.001	100.001	100.001	99.001	100.001	100.001	100.001	100.001	100.001	100.001	100.001	100.001	100.001	99.501	100.001	99.501	100.001	98.501	99.501	100.001	100.001
>KR337	100.001	100.001	99.001	99.501	100.001	100.001	97.401	99.001	100.001	100.001	100.001	99.501	99.501	100.001	99.001	100.001	100.001	100.001	99.501	100.001	99.501	99.501	100.001	100.001	99.501	99.001	99.501	99.501	99.001	100.001	100.001	99.001	100.001	100.001	100.001	100.001	100.001	100.001	100.001	100.001	100.001	99.501	100.001	99.501	100.001	98.501	99.501	100.001	100.001
>KR360	99.501	99.501	98.501	99.001	99.501	99.501	96.901	98.501	99.501	99.501	99.501	99.001	99.001	99.501	98.501	99.501	99.501	99.501	99.001	99.501	99.001	99.001	99.501	99.501	99.001	98.501	99.001	99.001	98.501	99.501	99.501	98.501	99.501	99.501	99.501	99.501	99.501	99.501	99.501	99.501	99.501	99.001	99.501	99.001	99.501	97.901	99.001	99.501	99.501
>KR383	100.001	100.001	99.001	99.501	100.001	100.001	97.401	99.001	100.001	100.001	100.001	99.501	99.501	100.001	99.001	100.001	100.001	100.001	99.501	100.001	99.501	99.501	100.001	100.001	99.501	99.001	99.501	99.501	99.001	100.001	100.001	99.001	100.001	100.001	100.001	100.001	100.001	100.001	100.001	100.001	100.001	99.501	100.001	99.501	100.001	98.501	99.501	100.001	100.001
>KR408	99.001	99.001	97.901	98.501	99.001	99.001	96.401	97.901	99.001	99.001	99.001	98.501	98.501	99.001	97.901	99.001	99.001	99.001	98.501	99.001	98.501	98.501	99.001	99.001	99.501	99.001	99.501	99.501	99.001	99.001	99.001	99.001	99.001	99.001	99.001	99.001	99.001	99.001	99.001	99.001	99.001	98.501	99.001	98.501	99.001	97.401	98.501	99.001	99.001
>KR416	100.001	100.001	99.001	99.501	100.001	100.001	97.401	99.001	100.001	100.001	100.001	99.501	99.501	100.001	99.001	100.001	100.001	100.001	99.501	100.001	99.501	99.501	100.001	100.001	99.501	99.001	99.501	99.501	99.001	100.001	100.001	99.001	100.001	100.001	100.001	100.001	100.001	100.001	100.001	100.001	100.001	99.501	100.001	99.501	100.001	98.501	99.501	100.001	100.001
>KR487	99.001	99.001	97.901	98.501	99.001	99.001	97.401	97.901	99.001	99.001	99.001	99.001	98.501	99.001	99.001	99.001	99.001	99.001	99.001	99.001	98.501	99.001	99.001	99.001	98.501	98.501	98.501	98.501	97.901	99.001	99.001	98.501	99.001	99.001	99.001	99.001	99.001	99.001	99.001	99.001	99.001	98.501	99.001	98.501	99.001	97.901	98.501	99.001	99.001
>KR493	100.001	100.001	99.001	99.501	100.001	100.001	97.401	99.001	100.001	100.001	100.001	99.501	99.501	100.001	99.001	100.001	100.001	100.001	99.501	100.001	99.501	99.501	100.001	100.001	99.501	99.001	99.501	99.501	99.001	100.001	100.001	99.001	100.001	100.001	100.001	100.001	100.001	100.001	100.001	100.001	100.001	99.501	100.001	99.501	100.001	98.501	99.501	100.001	100.001
>KR504	100.001	100.001	99.001	99.501	100.001	100.001	97.401	99.001	100.001	100.001	100.001	99.501	99.501	100.001	99.001	100.001	100.001	100.001	99.501	100.001	99.501	99.501	100.001	100.001	99.501	99.001	99.501	99.501	99.001	100.001	100.001	99.001	100.001	100.001	100.001	100.001	100.001	100.001	100.001	100.001	100.001	99.501	100.001	99.501	100.001	98.501	99.501	100.001	100.001
>KR563	100.001	100.001	99.001	99.501	100.001	100.001	97.401	99.001	100.001	100.001	100.001	99.501	99.501	100.001	99.001	100.001	100.001	100.001	99.501	100.001	99.501	99.501	100.001	100.001	99.501	99.001	99.501	99.501	99.001	100.001	100.001	99.001	100.001	100.001	100.001	100.001	100.001	100.001	100.001	100.001	100.001	99.501	100.001	99.501	100.001	98.501	99.501	100.001	100.001
>KR573	100.001	100.001	99.001	99.501	100.001	100.001	97.401	99.001	100.001	100.001	100.001	99.501	99.501	100.001	99.001	100.001	100.001	100.001	99.501	100.001	99.501	99.501	100.001	100.001	99.501	99.001	99.501	99.501	99.001	100.001	100.001	99.001	100.001	100.001	100.001	100.001	100.001	100.001	100.001	100.001	100.001	99.501	100.001	99.501	100.001	98.501	99.501	100.001	100.001
>KR579	100.001	100.001	99.001	99.501	100.001	100.001	97.401	99.001	100.001	100.001	100.001	99.501	99.501	100.001	99.001	100.001	100.001	100.001	99.501	100.001	99.501	99.501	100.001	100.001	99.501	99.001	99.501	99.501	99.001	100.001	100.001	99.001	100.001	100.001	100.001	100.001	100.001	100.001	100.001	100.001	100.001	99.501	100.001	99.501	100.001	98.501	99.501	100.001	100.001
>KR588	100.001	100.001	99.001	99.501	100.001	100.001	97.401	99.001	100.001	100.001	100.001	99.501	99.501	100.001	99.001	100.001	100.001	100.001	99.501	100.001	99.501	99.501	100.001	100.001	99.501	99.001	99.501	99.501	99.001	100.001	100.001	99.001	100.001	100.001	100.001	100.001	100.001	100.001	100.001	100.001	100.001	99.501	100.001	99.501	100.001	98.501	99.501	100.001	100.001
>KR593	100.001	100.001	99.001	99.501	100.001	100.001	97.401	99.001	100.001	100.001	100.001	99.501	99.501	100.001	99.001	100.001	100.001	100.001	99.501	100.001	99.501	99.501	100.001	100.001	99.501	99.001	99.501	99.501	99.001	100.001	100.001	99.001	100.001	100.001	100.001	100.001	100.001	100.001	100.001	100.001	100.001	99.501	100.001	99.501	100.001	98.501	99.501	100.001	100.001
>KR602	99.501	99.501	98.501	99.001	99.501	99.501	97.401	98.501	99.501	99.501	99.501	99.501	99.001	99.501	99.501	99.501	99.501	99.501	99.501	99.501	99.001	99.501	99.501	99.501	99.001	99.001	99.001	99.001	98.501	99.501	99.501	99.001	99.501	99.501	99.501	99.501	99.501	99.501	99.501	99.501	99.501	99.001	99.501	99.001	99.501	98.501	99.001	99.501	99.501
>KR605	99.001	99.001	97.901	98.501	99.001	99.001	97.901	97.901	99.001	99.001	99.001	99.001	98.501	99.001	98.501	99.001	99.001	99.001	99.001	99.001	98.501	99.001	99.001	99.001	98.501	99.001	98.501	98.501	97.901	99.001	99.001	99.001	99.001	99.001	99.001	99.001	99.001	99.001	99.001	99.001	99.001	98.501	99.001	98.501	99.001	97.901	98.501	99.001	99.001
>KR620	100.001	100.001	99.001	99.501	100.001	100.001	97.401	99.001	100.001	100.001	100.001	99.501	99.501	100.001	99.001	100.001	100.001	100.001	99.501	100.001	99.501	99.501	100.001	100.001	99.501	99.001	99.501	99.501	99.001	100.001	100.001	99.001	100.001	100.001	100.001	100.001	100.001	100.001	100.001	100.001	100.001	99.501	100.001	99.501	100.001	98.501	99.501	100.001	100.001
>KR625	100.001	100.001	99.001	99.501	100.001	100.001	97.401	99.001	100.001	100.001	100.001	99.501	99.501	100.001	99.001	100.001	100.001	100.001	99.501	100.001	99.501	99.501	100.001	100.001	99.501	99.001	99.501	99.501	99.001	100.001	100.001	99.001	100.001	100.001	100.001	100.001	100.001	100.001	100.001	100.001	100.001	99.501	100.001	99.501	100.001	98.501	99.501	100.001	100.001
>KR634	100.001	100.001	99.001	99.501	100.001	100.001	97.401	99.001	100.001	100.001	100.001	99.501	99.501	100.001	99.001	100.001	100.001	100.001	99.501	100.001	99.501	99.501	100.001	100.001	99.501	99.001	99.501	99.501	99.001	100.001	100.001	99.001	100.001	100.001	100.001	100.001	100.001	100.001	100.001	100.001	100.001	99.501	100.001	99.501	100.001	98.501	99.501	100.001	100.001
>KR637	100.001	100.001	99.001	99.501	100.001	100.001	97.401	99.001	100.001	100.001	100.001	99.501	99.501	100.001	99.001	100.001	100.001	100.001	99.501	100.001	99.501	99.501	100.001	100.001	99.501	99.001	99.501	99.501	99.001	100.001	100.001	99.001	100.001	100.001	100.001	100.001	100.001	100.001	100.001	100.001	100.001	99.501	100.001	99.501	100.001	98.501	99.501	100.001	100.001
>KR1495	99.001	99.001	97.901	98.501	99.001	99.001	96.401	97.901	99.001	99.001	99.001	98.501	98.501	99.001	97.901	99.001	99.001	99.001	98.501	99.001	98.501	98.501	99.001	99.001	99.001	98.501	99.001	99.001	98.501	99.001	99.001	98.501	99.001	99.001	99.001	99.001	99.001	99.001	99.001	99.001	99.001	98.501	99.001	98.501	99.001	97.401	98.501	99.001	99.001
>384lib	100.001	100.001	99.001	99.501	100.001	100.001	97.401	99.001	100.001	100.001	100.001	99.501	99.501	100.001	99.001	100.001	100.001	100.001	99.501	100.001	99.501	99.501	100.001	100.001	99.501	99.001	99.501	99.501	99.001	100.001	100.001	99.001	100.001	100.001	100.001	100.001	100.001	100.001	100.001	100.001	100.001	99.501	100.001	99.501	100.001	98.501	99.501	100.001	100.001
>393lib	100.001	100.001	99.001	99.501	100.001	100.001	97.401	99.001	100.001	100.001	100.001	99.501	99.501	100.001	99.001	100.001	100.001	100.001	99.501	100.001	99.501	99.501	100.001	100.001	99.501	99.001	99.501	99.501	99.001	100.001	100.001	99.001	100.001	100.001	100.001	100.001	100.001	100.001	100.001	100.001	100.001	99.501	100.001	99.501	100.001	98.501	99.501	100.001	100.001
>409lib	99.001	99.001	100.001	98.501	99.001	99.001	98.501	97.901	99.001	99.001	99.001	98.501	98.501	99.001	97.901	99.001	99.001	99.001	98.501	99.001	98.501	98.501	99.001	99.001	98.501	97.901	98.501	98.501	97.901	99.001	99.001	97.901	99.001	99.001	99.001	99.001	99.001	99.001	99.001	99.001	99.001	98.501	99.001	98.501	99.001	99.501	98.501	99.001	99.001
>508lib	100.001	100.001	99.001	99.501	100.001	100.001	97.401	99.001	100.001	100.001	100.001	99.501	99.501	100.001	99.001	100.001	100.001	100.001	99.501	100.001	99.501	99.501	100.001	100.001	99.501	99.001	99.501	99.501	99.001	100.001	100.001	99.001	100.001	100.001	100.001	100.001	100.001	100.001	100.001	100.001	100.001	99.501	100.001	99.501	100.001	98.501	99.501	100.001	100.001
>1524lib	99.501	99.501	98.501	99.001	99.501	99.501	97.401	98.501	99.501	99.501	99.501	99.501	99.001	99.501	99.001	99.501	99.501	99.501	99.501	99.501	99.001	99.501	99.501	99.501	99.001	99.501	99.001	99.001	98.501	99.501	99.501	99.501	99.501	99.501	99.501	99.501	99.501	99.501	99.501	99.501	99.501	99.001	99.501	99.001	99.501	98.501	99.001	99.501	99.501
	>RC48	>RC50	>RC104	>RC106	>RC110	>RC113	>RC119	>RC129	>RC149	>RC167	>RC183	>RC185	>RC218	>RC234	>RC240	>RC246	>RC249	>RC251	>RC253	>RC254	>RC257	>RC258	>RC265	>RC274	>RC281	>RC282	>RC287	>RC288	>RC290	>RC301	>RC309	>RC311	>RC326	>RC336	>RC338	>RC339	>RC346	>RC352	>RC408	>RC445	>RC446	>RC473	>RC511	>RC545	>RC561	>RC595	>RC610	>RC632	>RC639
[truncated: 72 more columns]

## Sheet: Table S8
Supplementary materials, Shvets and Vinogradova, 2022. Occurrence and Genetic Characterization of Grapevine Pinot Gris Virus in Russia
Supplementary Table S8. List of primers and probes used for qPCR
Primer Name	Primer Sequence (5'-3')	Funcion of the amplified region	PCR-product, bp	Reference
GPgV504_F	GAATCGCTTGCTTTTTCATG	GPGV coat protein	85	[37]
GPgV588_R	CTACATACTAAATGCACTCTCC
GPgV CP542_P	(FAM)AGACTAATGCTA(T-BHQ1)TCACGGCTTCGG(P)
GAPDH_3F	GCTGCTGCCCATTTGAAG	Plant GAPDH	80	[37]
GAPDH_1R	CCAACAACGAACATAGGAGCA
GAPDH_P	(ROX)GGTTGTCATCTC(T-BHQ2)AGCCCCAAGCA(P)
Chap_F	GGTCCTTTGGATGAGGATGG	Plant Cpn21	90	[71]
Chap_R	GAAGTCATTCCCTGCATACTTGG
Chap_P	(ROX)GAAACCACTGTCT(T-BHQ2)GTGAGCCCAGGA(P)

## Sheet: Table S9
Supplementary materials, Shvets and Vinogradova, 2022. Occurrence and Genetic Characterization of Grapevine Pinot Gris Virus in Russia
Supplementary Table S9. List of primers used for phylogenetic analysis
Primer Name	Primer Sequence (5' – 3')	Length, bp	Target region	PCR-product, bp	Reference
GPgMP_5521_F	GACATCTTCTAAAGGGCAARTC	22	MP	346	This paper
GPgMP_5845_R	GATCTATTGAAATGGACAGAGC	22
GPgMP_5788_F	CCRATGGAGCAATTGAAGCT	20		330
GPgMP_6098_R	ACCTATCCTCACAGAAATGG	20
GPgMP_6026_F	ATCCCCGHCTTTCCACGTGT	20		360
GPgMP_6365_R	AAGACAAGGGMCCDACATCAT	21
GPgMP_6271_F	CCTTCGGACAGTTCATCYAT	20		333
GPgMP_6583_R	TGACGAATCGACATRTCTTCC	21
GPgCP_6502_F	GTRAAGATGGTTAAGTCTAAATCTG	25	CP	421	[32]
GPgCP_6903_R	TGCAAAGGCCGCACAHACTT	20			This paper
GPgCP_6847_F	AAGGGTRTATAAGGAATCRCA	21		390
GPgCP_7216_R	CGTAGACATTAAGAAGTTACG	21			[32]
	Schematic representation of primers on GPGV genome
